# Supplementary material for: Chronic p27Kip1 Induction by Dexamethasone Causes Senescence Phenotype and Permanent Cell Cycle Blockade in Lung Adenocarcinoma Cells Over-expressing Glucocorticoid Receptor
Source: PubMed Central journal article supplement (PMC6207728; doi:10.1038/s41598-018-34475-8), 2018-10-30

**Manuscript title:**

Chronic p27<sup>Kip1</sup> Induction by Dexamethasone Causes Senescence Phenotype and Permanent Cell Cycle Blockade in Lung Adenocarcinoma Cells Over-expressing Glucocorticoid Receptor

**Authors:**

Mugdha Patki, Thomas McFall, Rayna Rosati, Yanfang Huang, Agnes Malysa, Lisa Polin, Abigail Fielder, Mike R. Wilson, Fulvio Lonardo, Jessica Back, Jing Li, Larry H. Matherly, Gerold Bepler and Manohar Ratnam

## **Scans of original autorads for the cropped western blot data in the manuscript Figures**

**Please Note: When a western blot is probed for GAPDH loading control (example, Figure 1B), we typically use a single film to obtain multiple exposures by sliding the blot to different positions on the same film. This helps to avoid overexposure of the relatively strong GAPDH bands.**

**Each cropped image in the manuscript is from a single western blot, without any splicing of sample lanes.**

Figure 1B\_GR

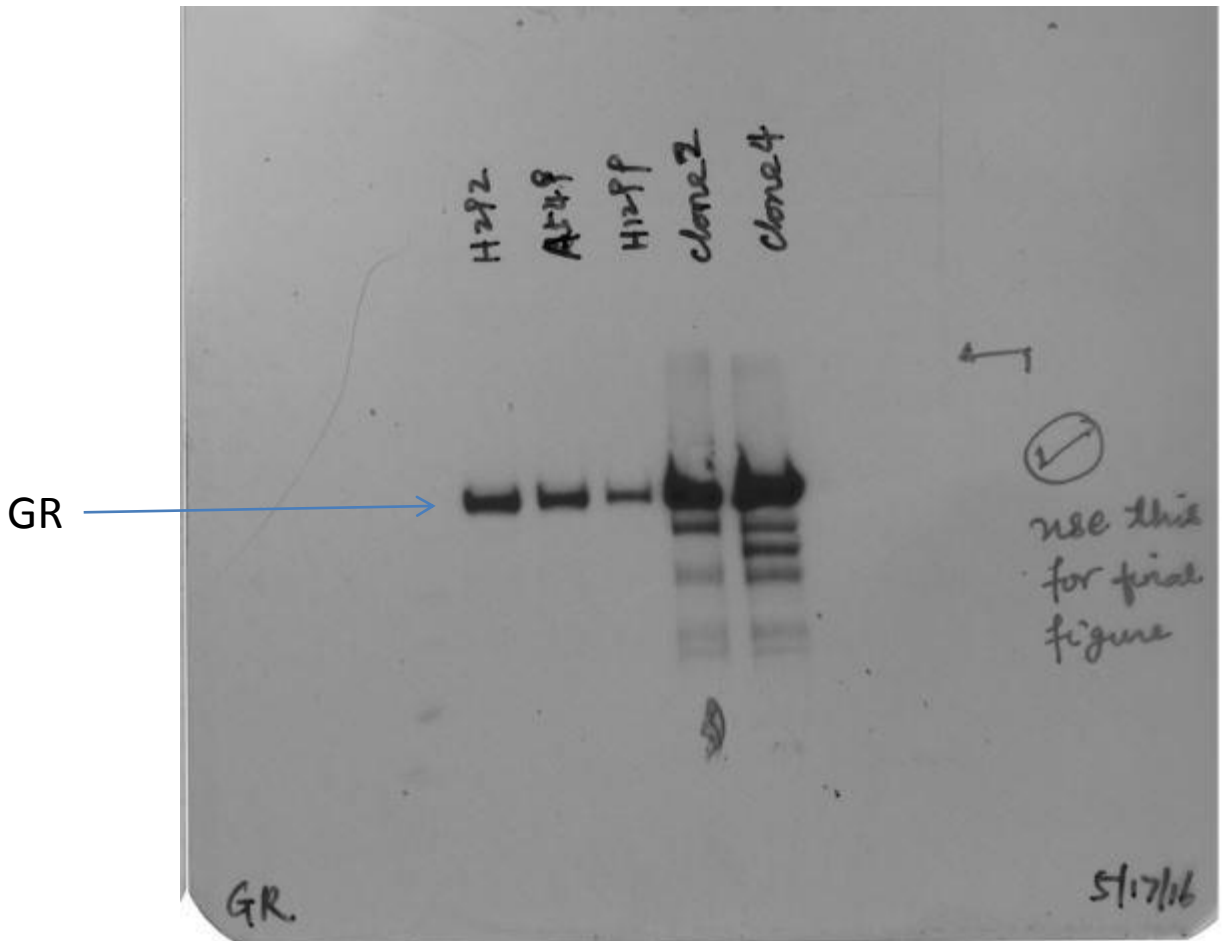



Figure 5A\_A549\_Clone2\_H1299\_Clone4\_p16

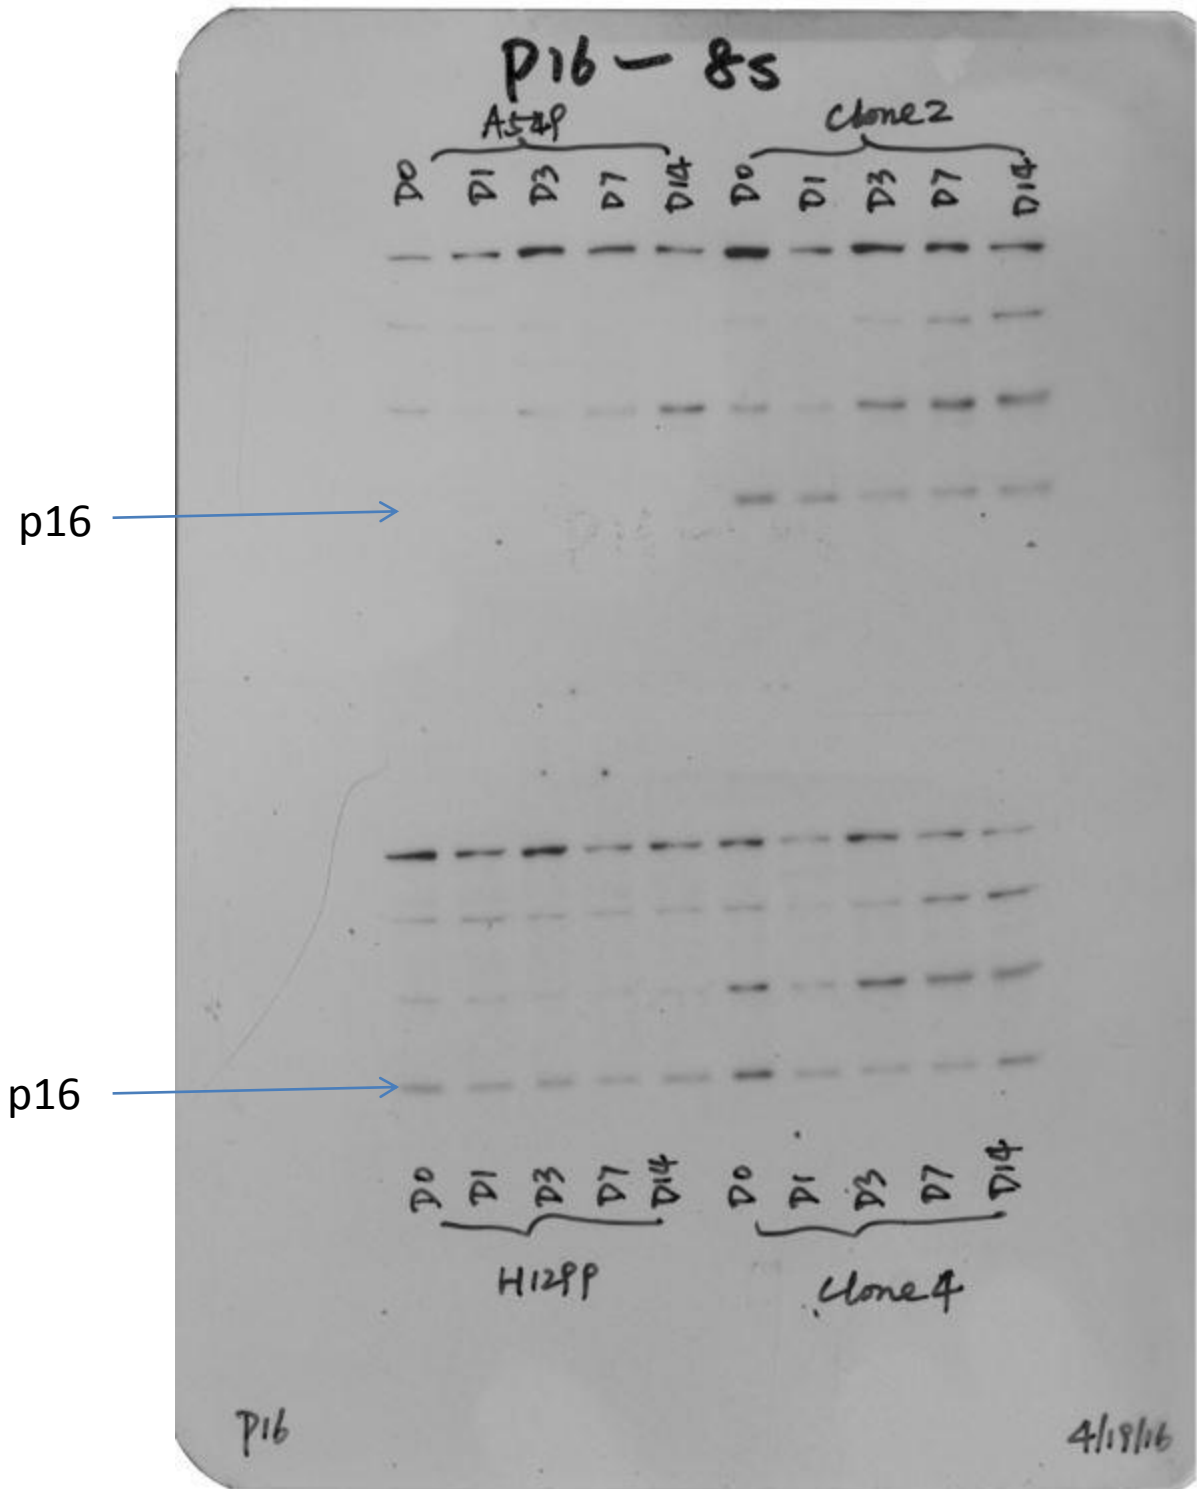

Figure 5A\_A549\_Clone2\_H1299\_Clone4\_p21

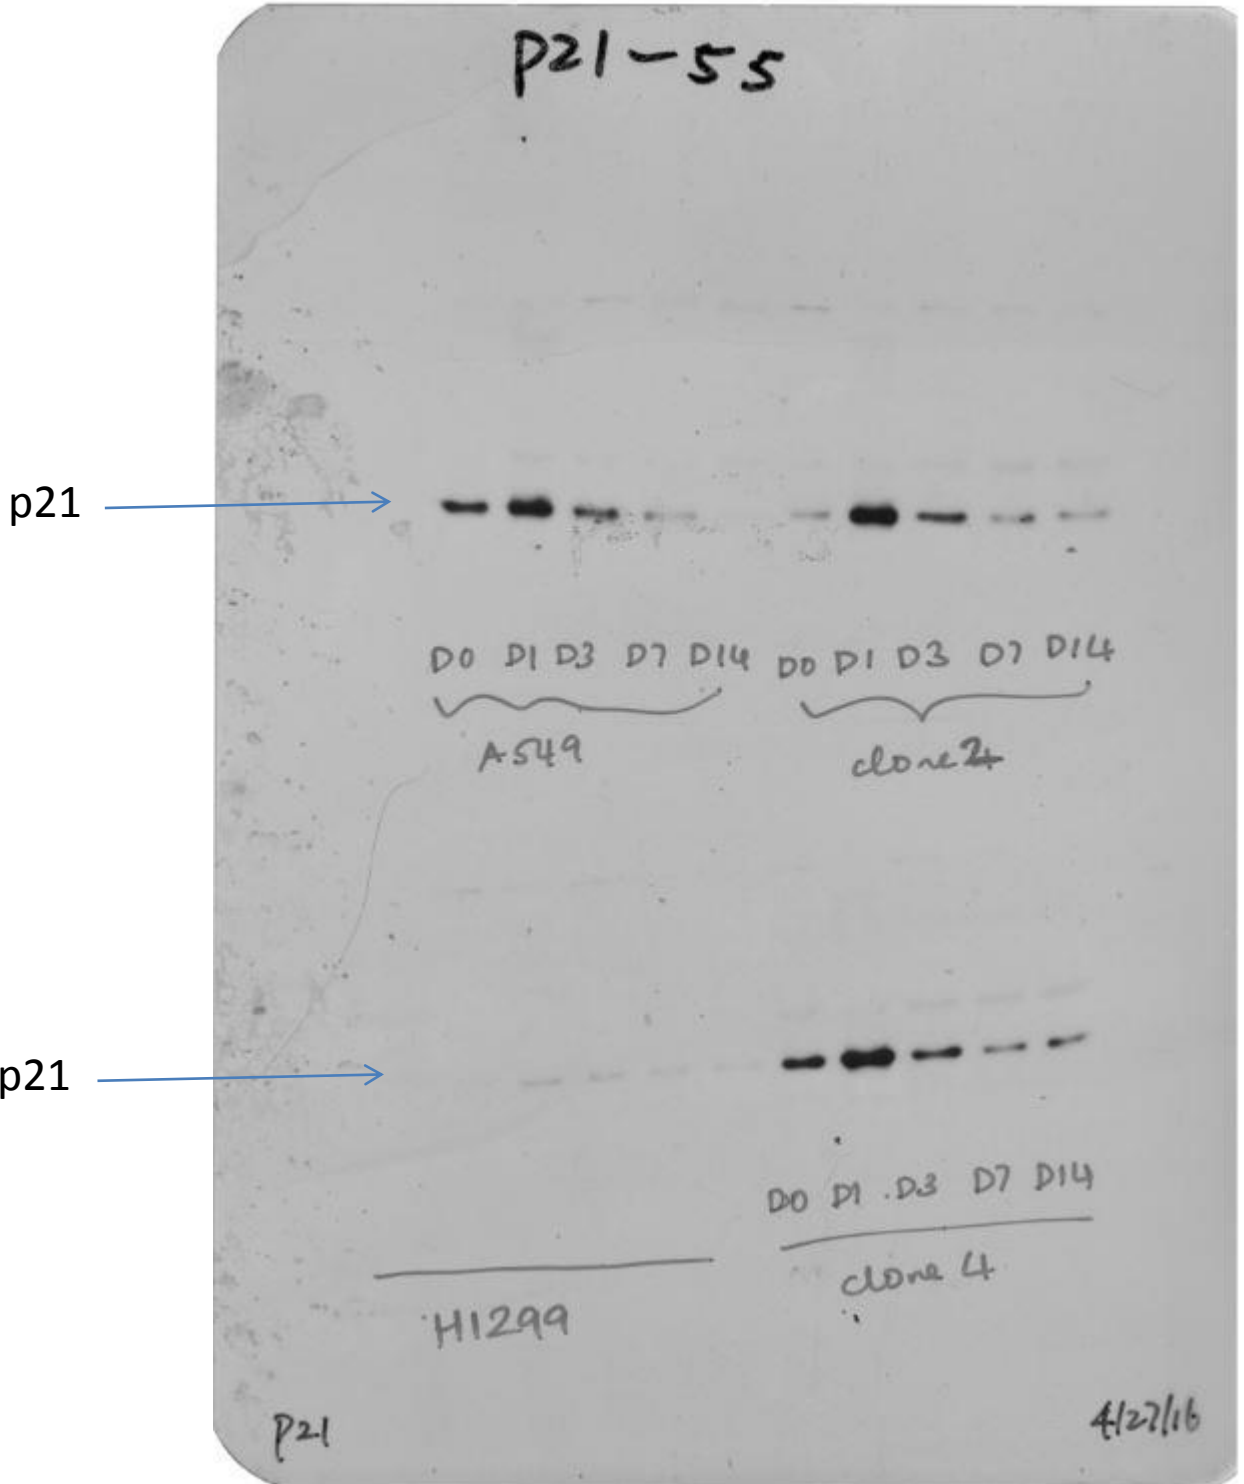

Figure 5A\_A549\_Clone2\_H1299\_Clone4\_p27

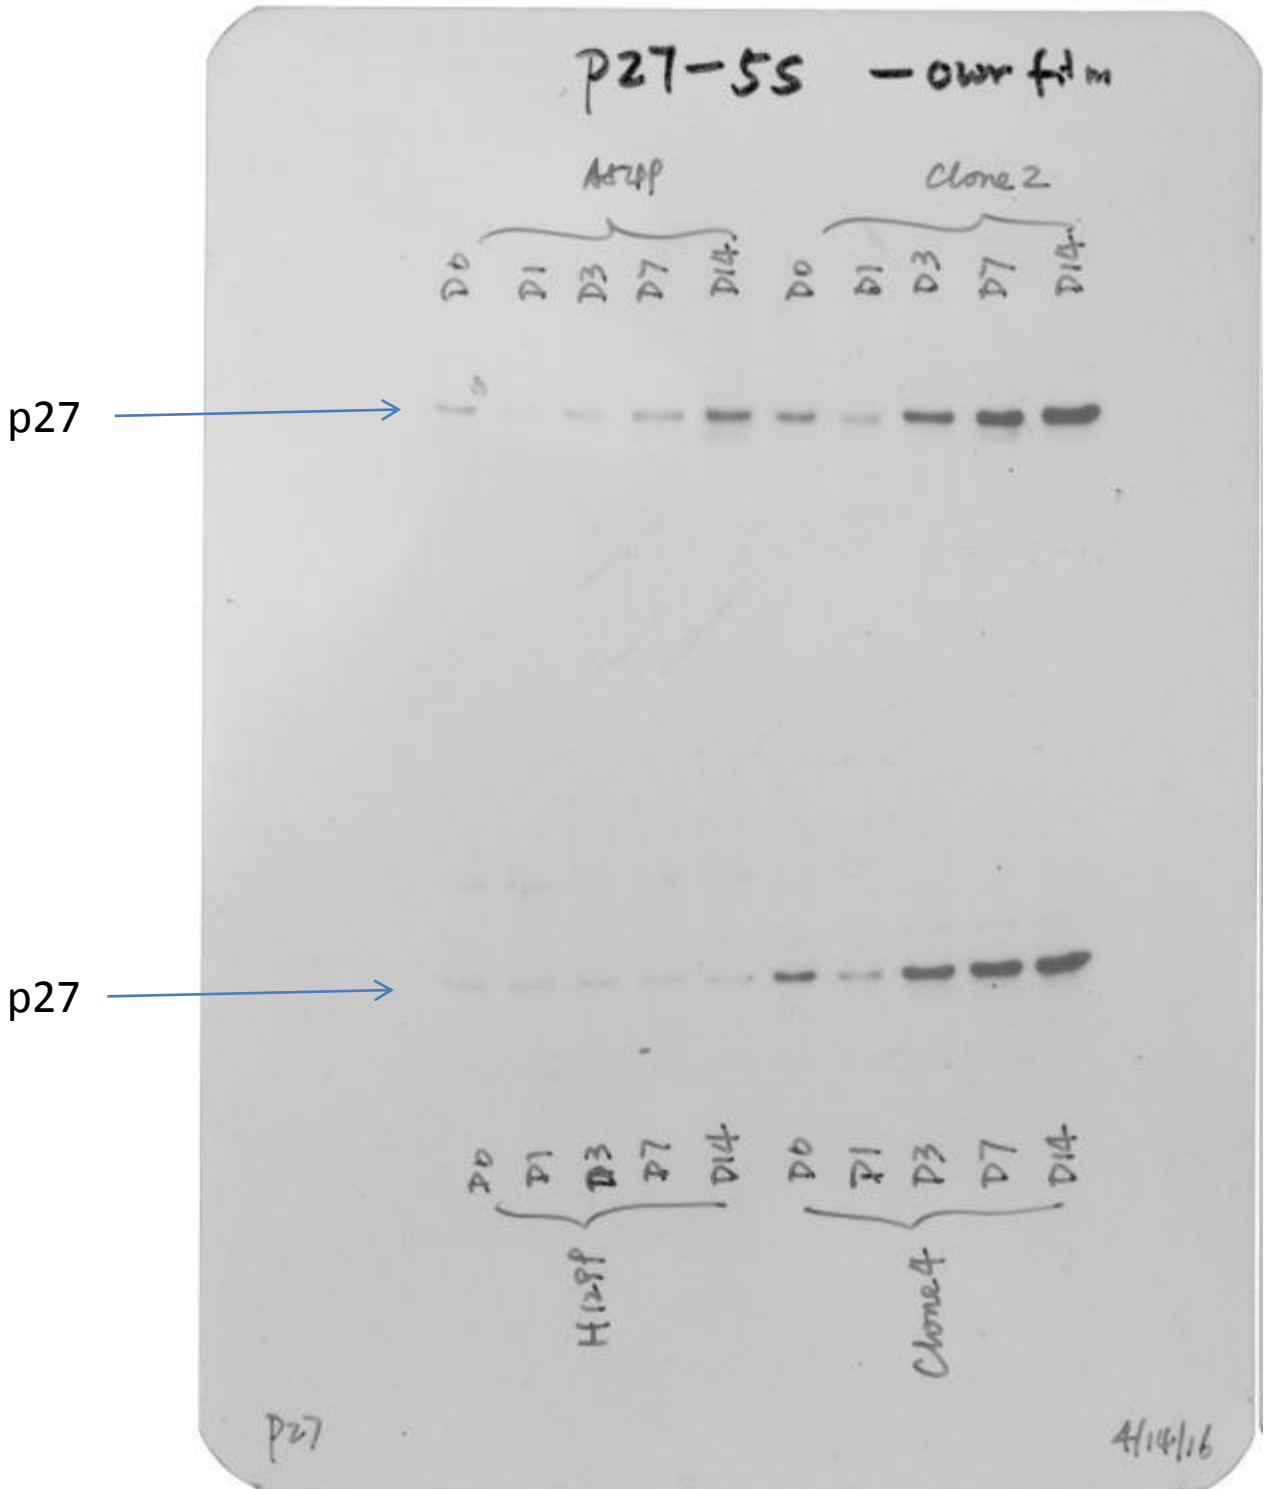

Figure 5A\_A549\_Clone2\_GAPDH

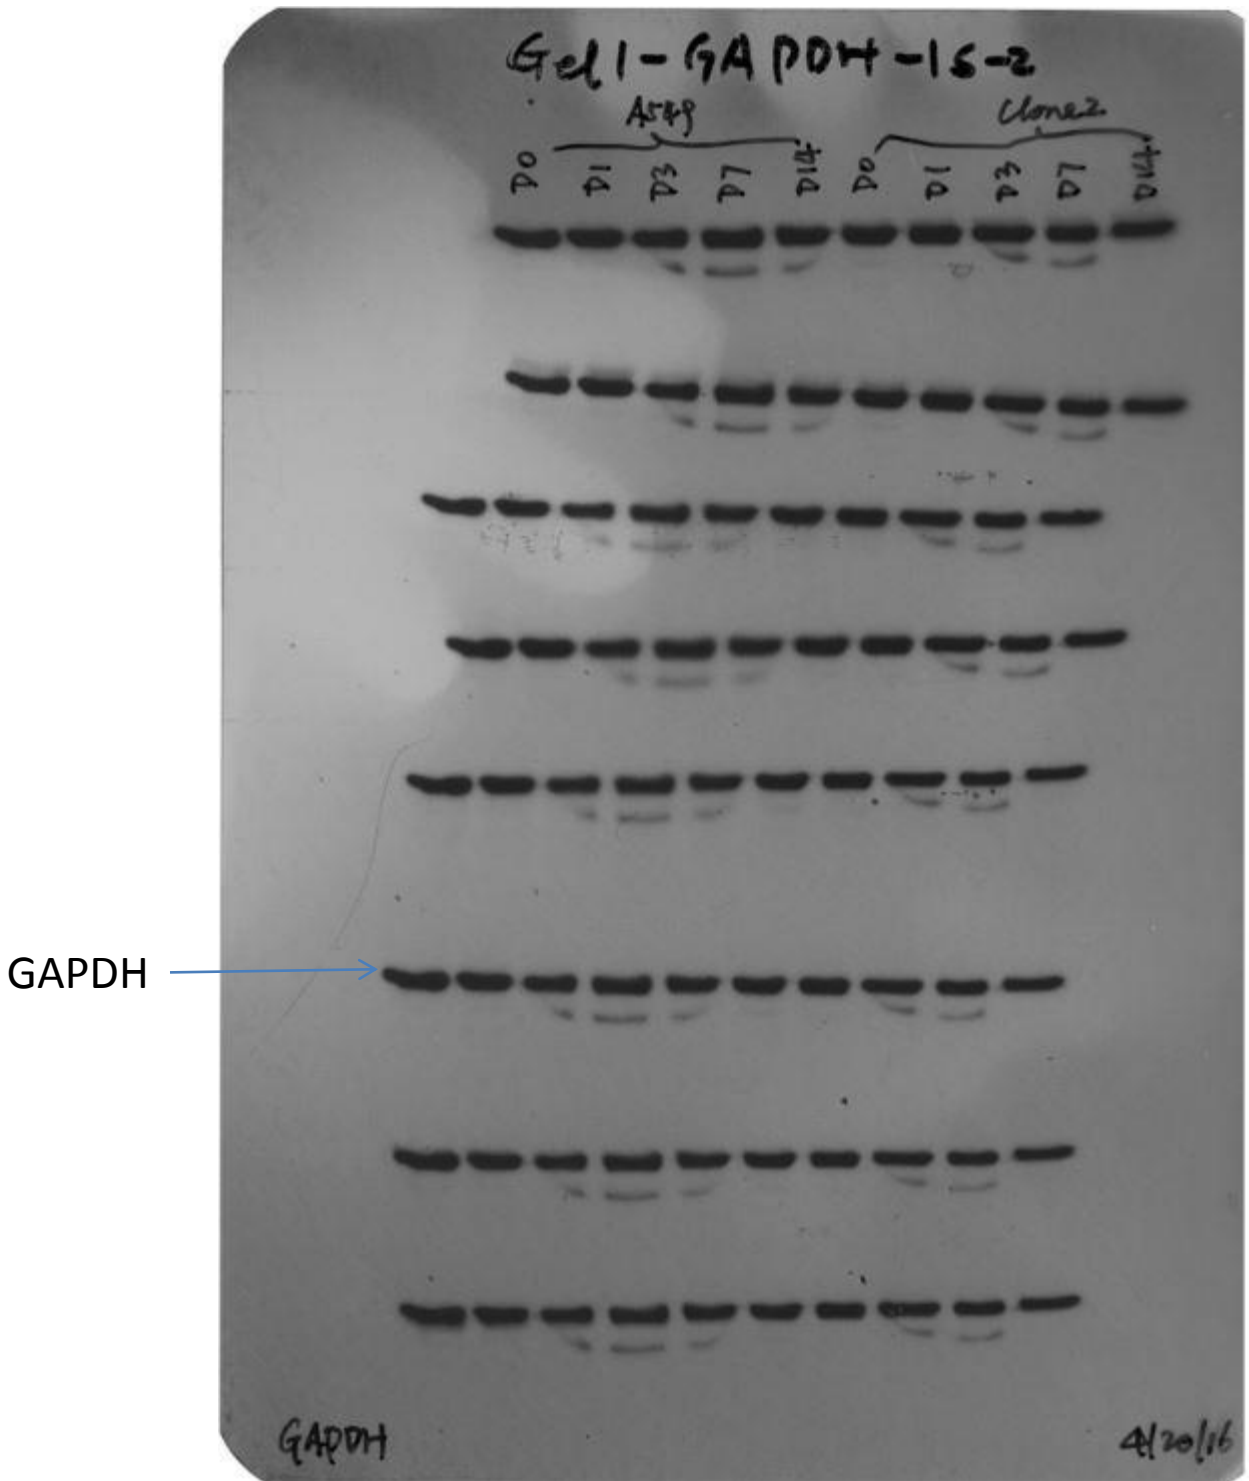



Figure 5A\_H1299\_Clone4\_GAPDH

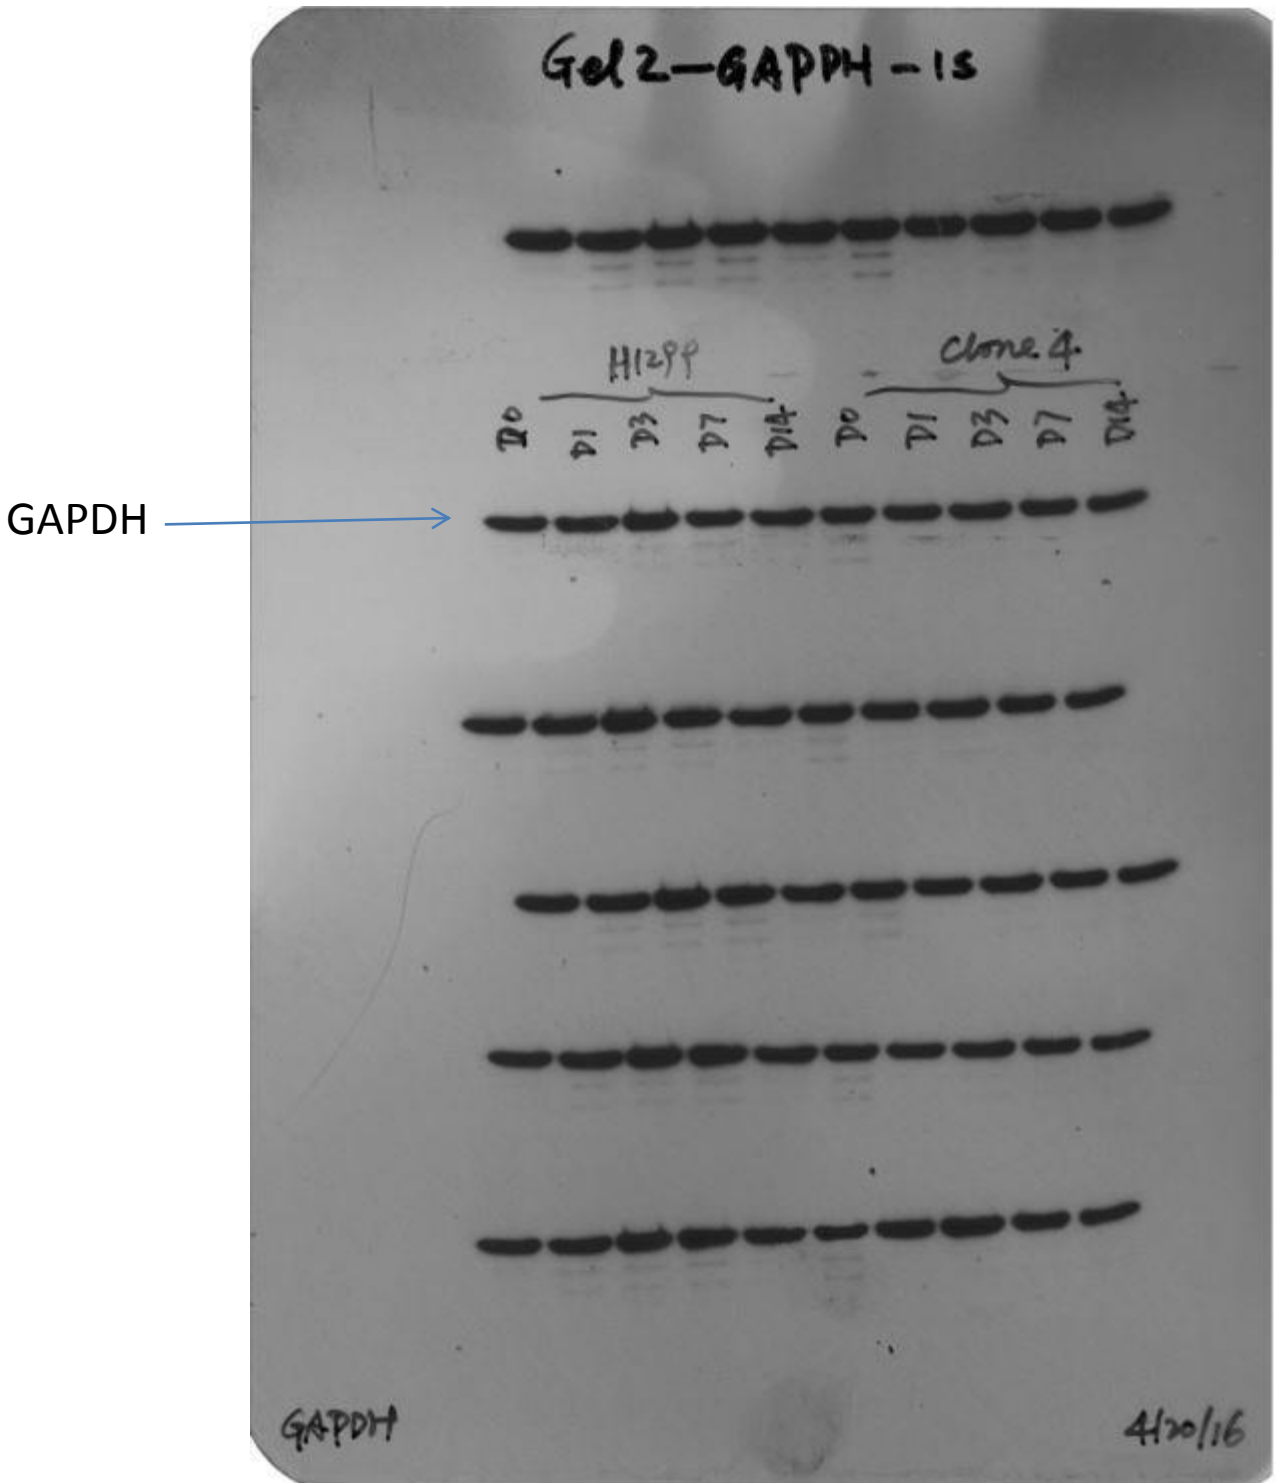

Figure 5A\_H292\_p21\_p16

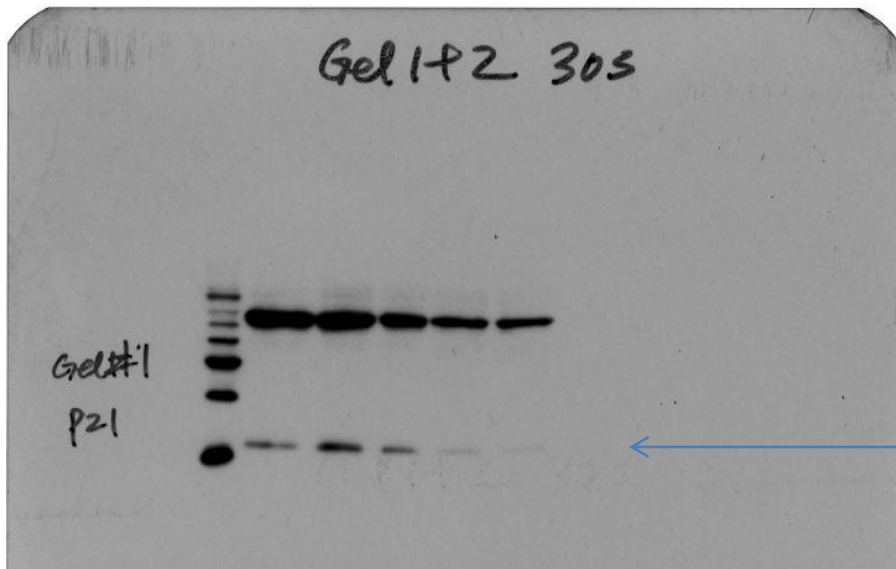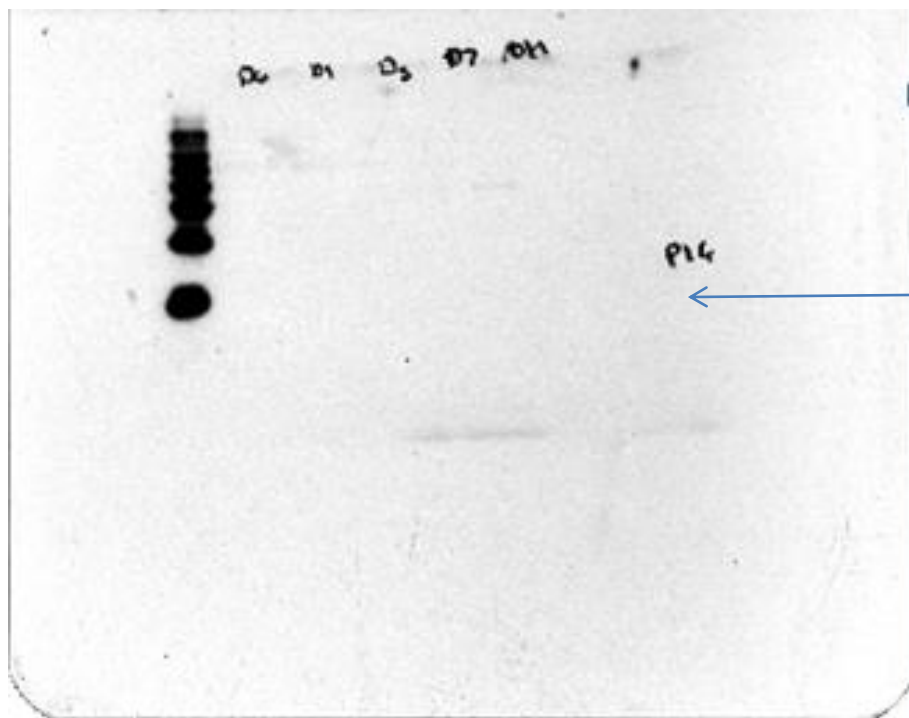

Figure 5A\_H292\_p27\_GAPDH

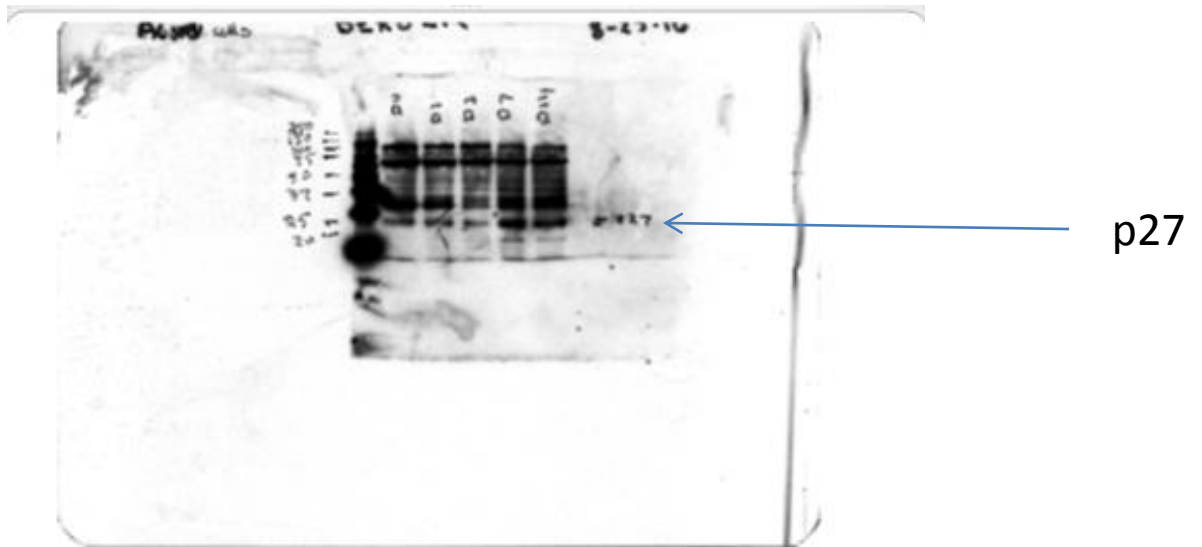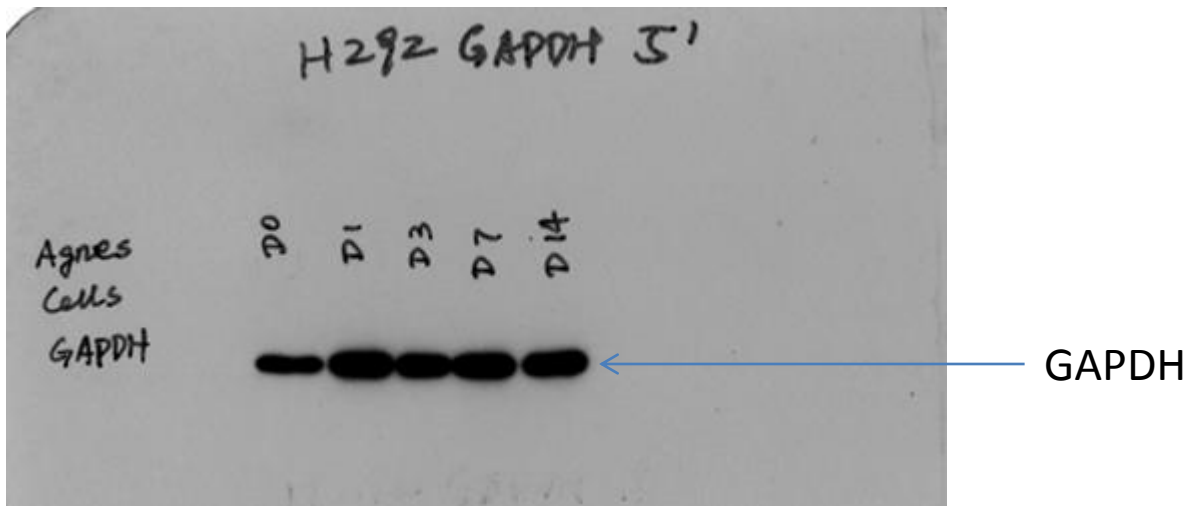

Figure 5B\_Clone4\_p21+p27

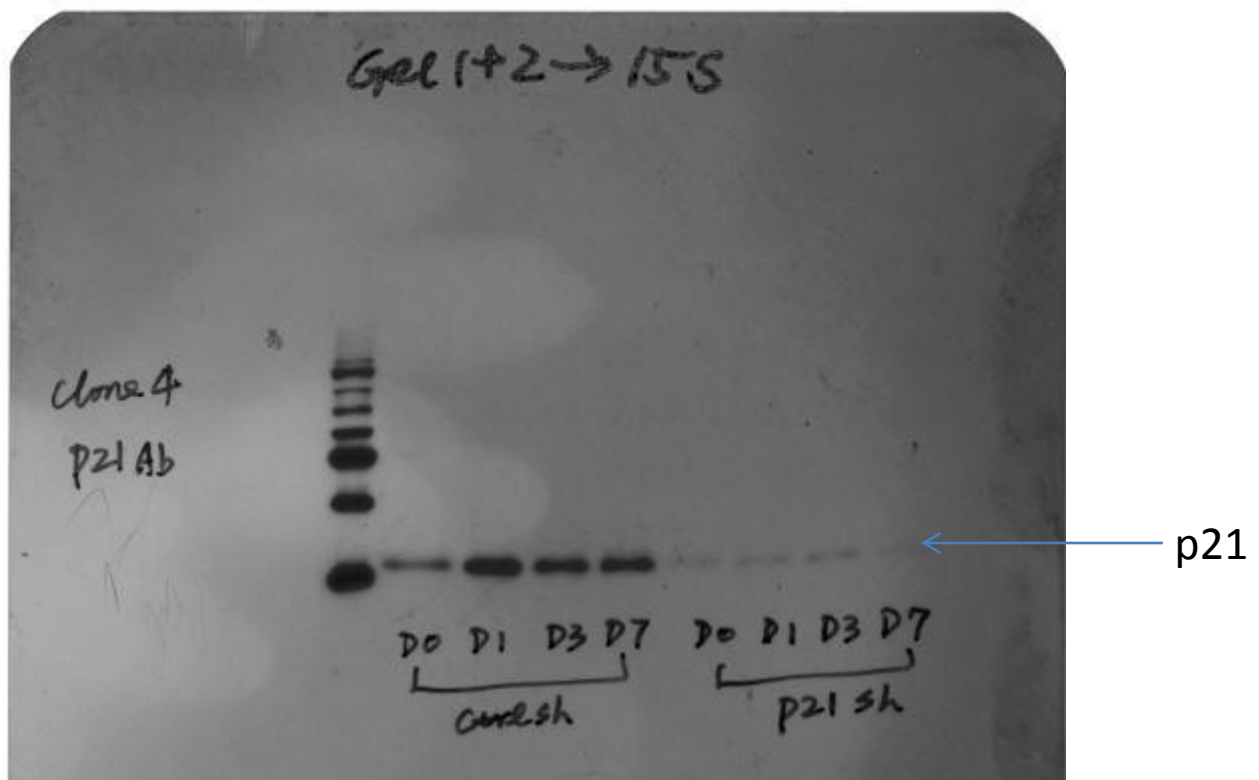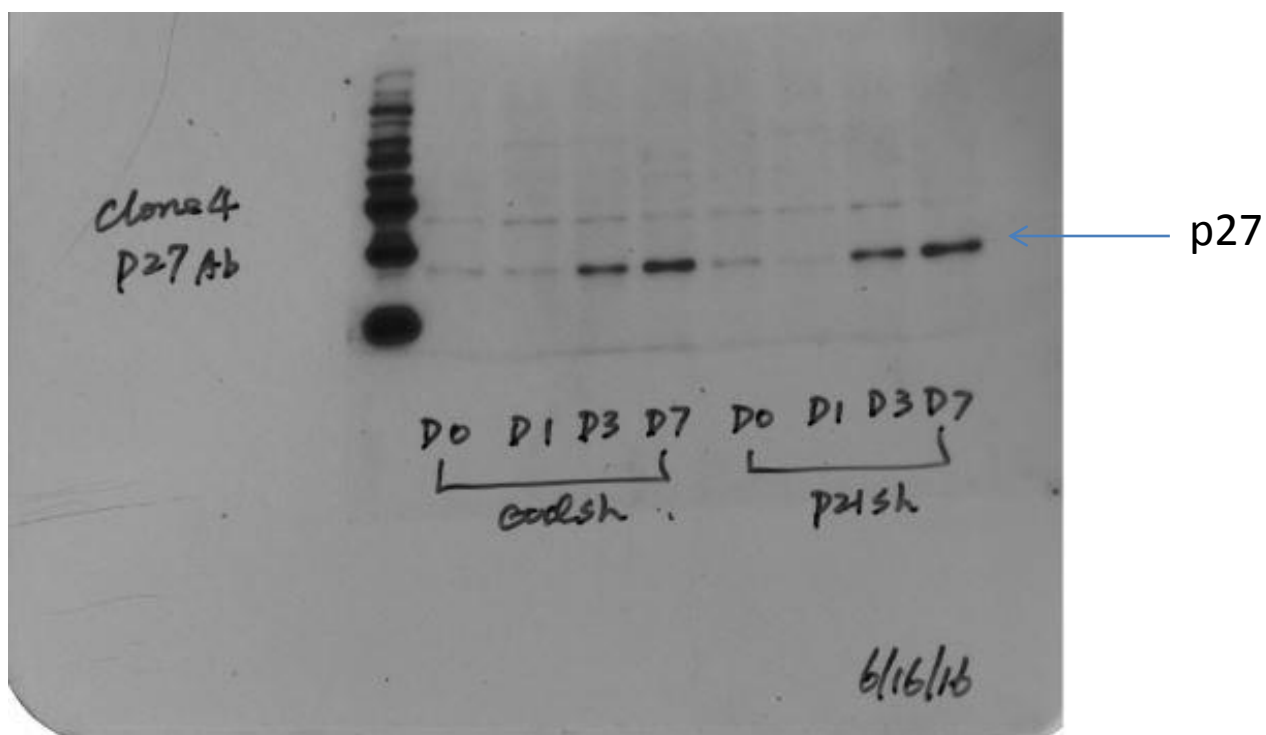

Figure 5B\_Clone4\_GAPDH

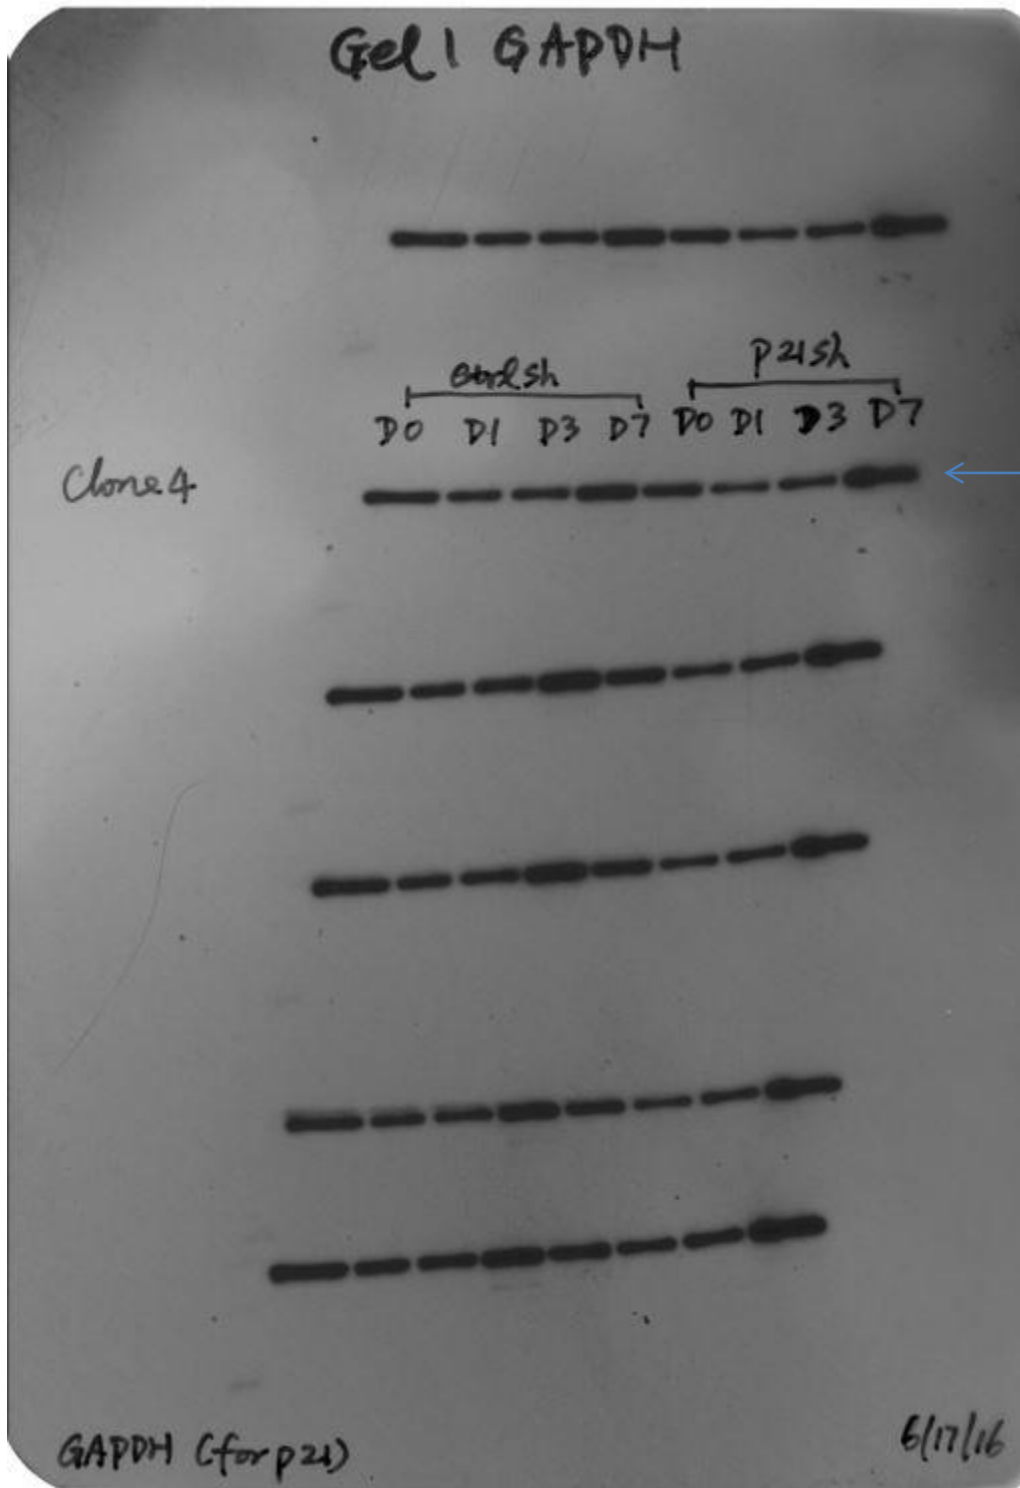

Figure 5D\_Clone4\_p27

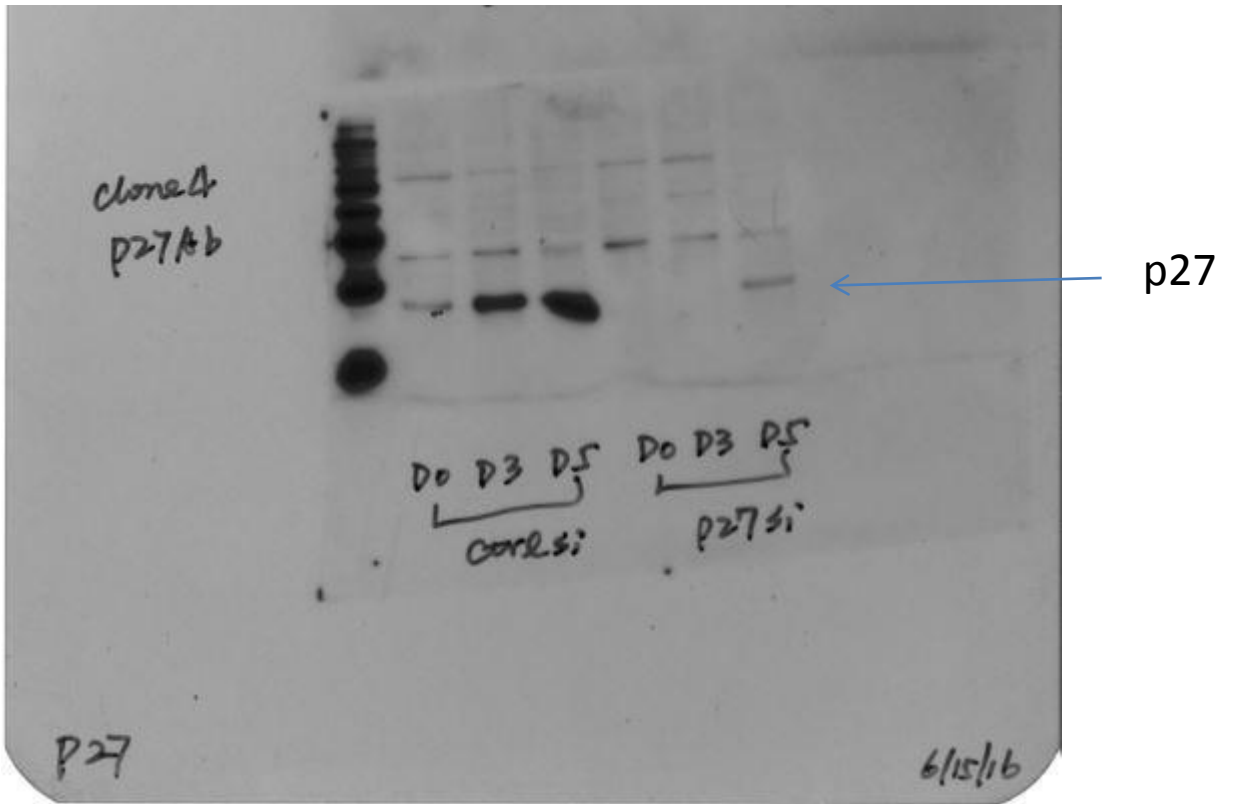

Figure 5D\_Clone4\_GAPDH

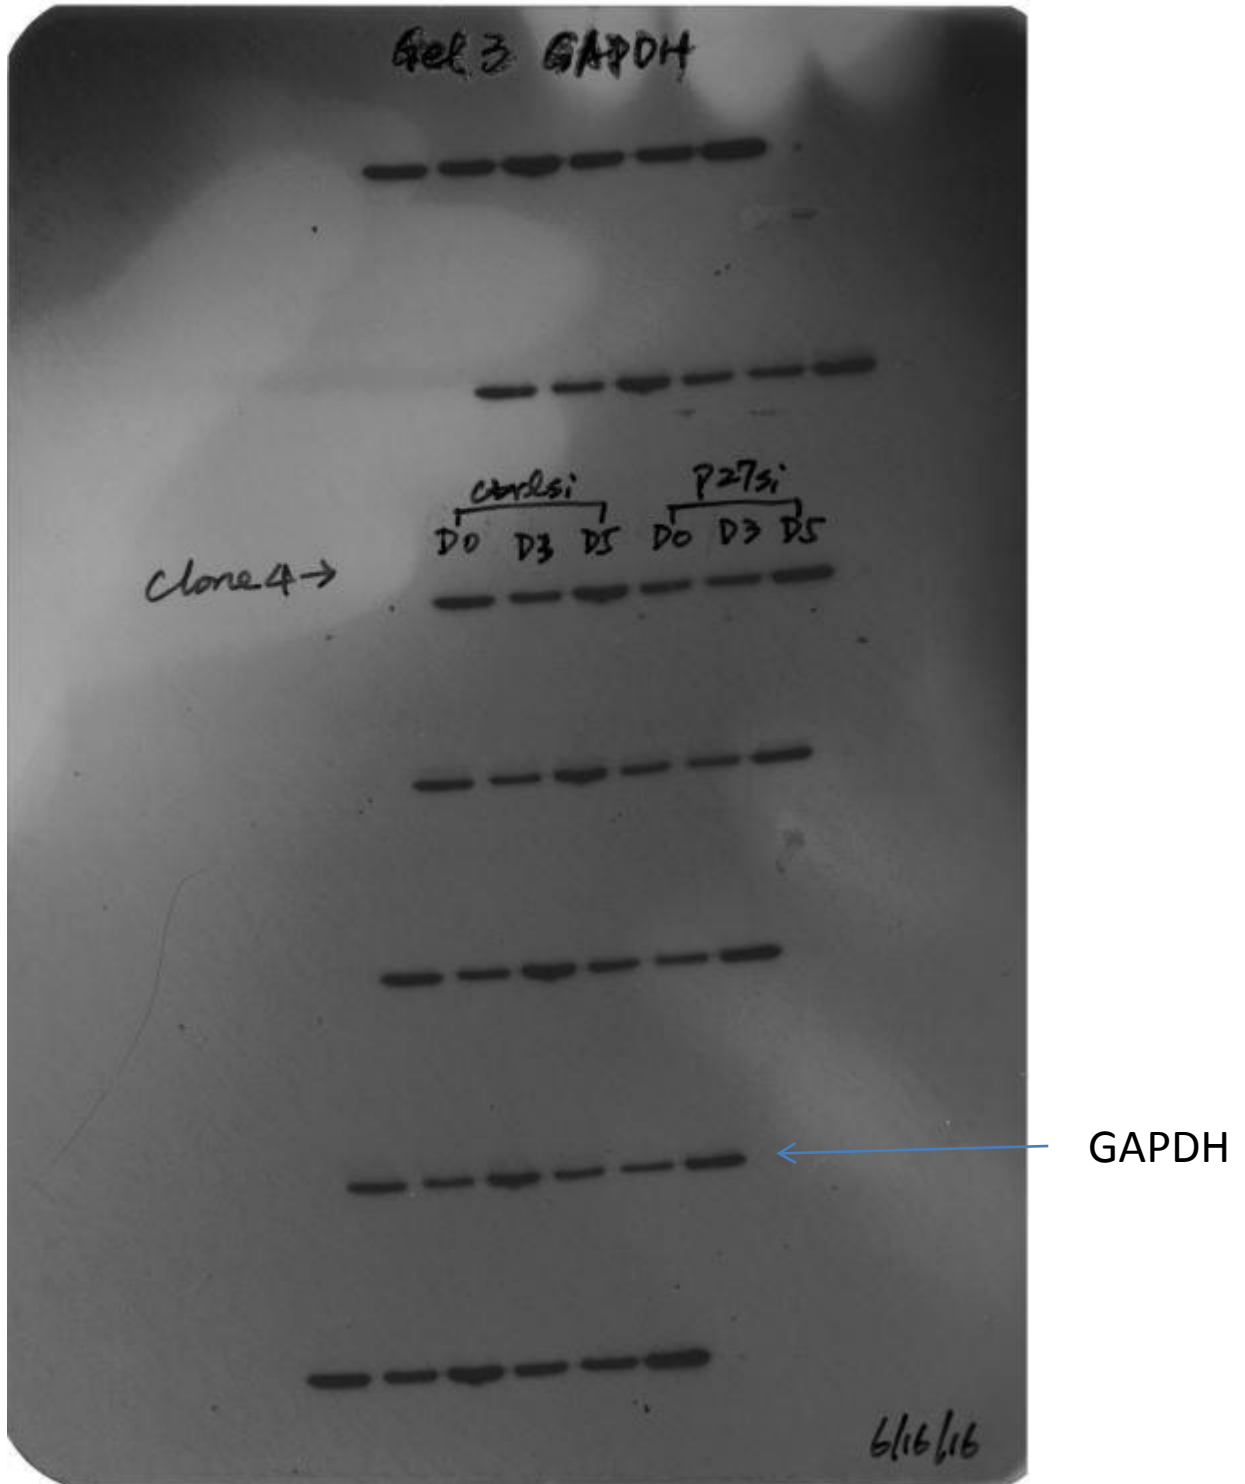

Figure 5G\_Clone4\_p27

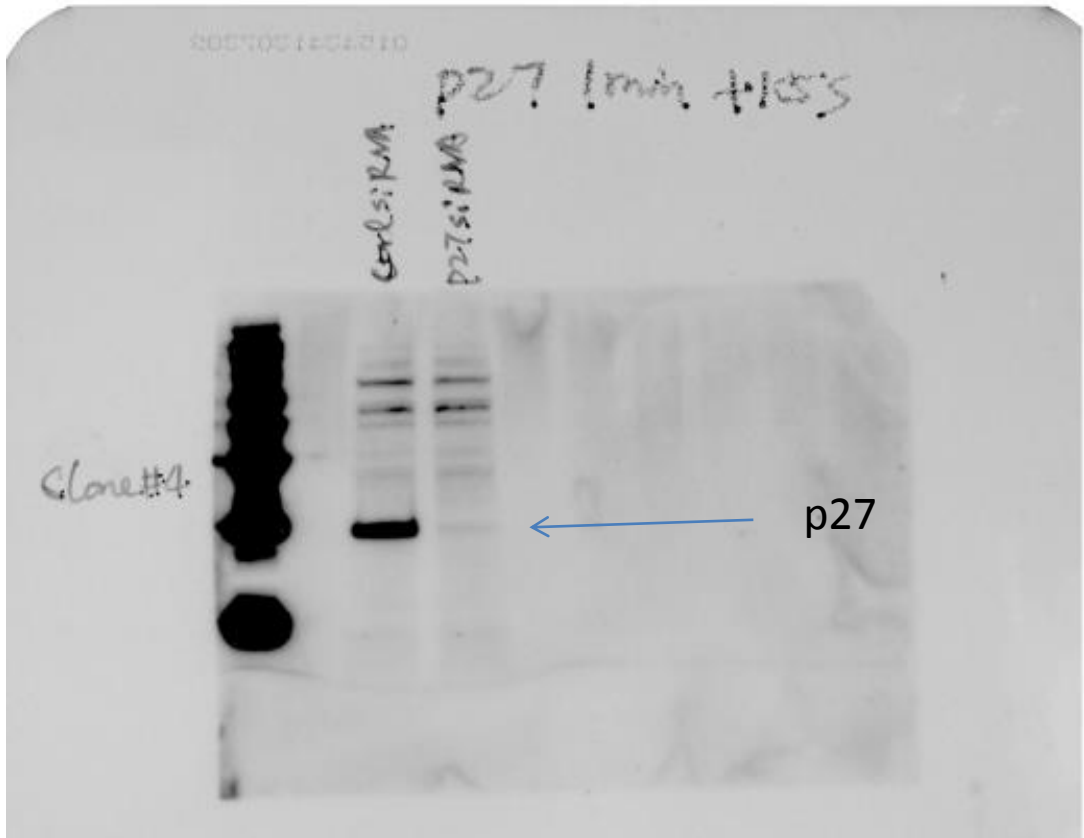



Figure 5G\_Clone4\_GAPDH

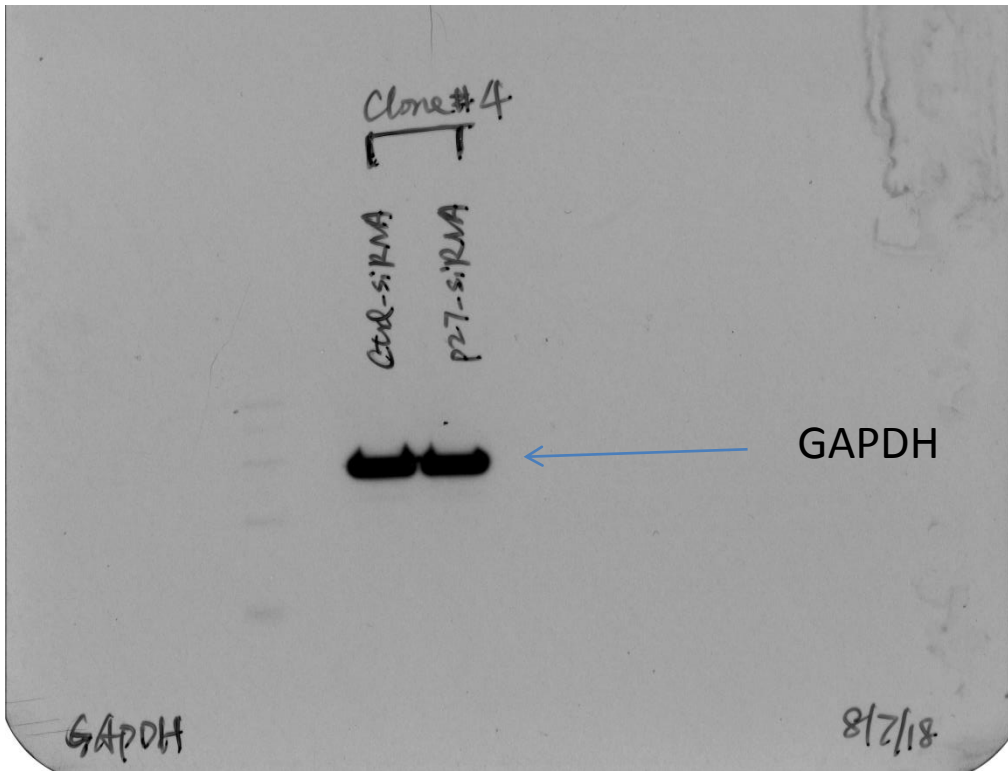

Figure 5H\_Clone4\_p27

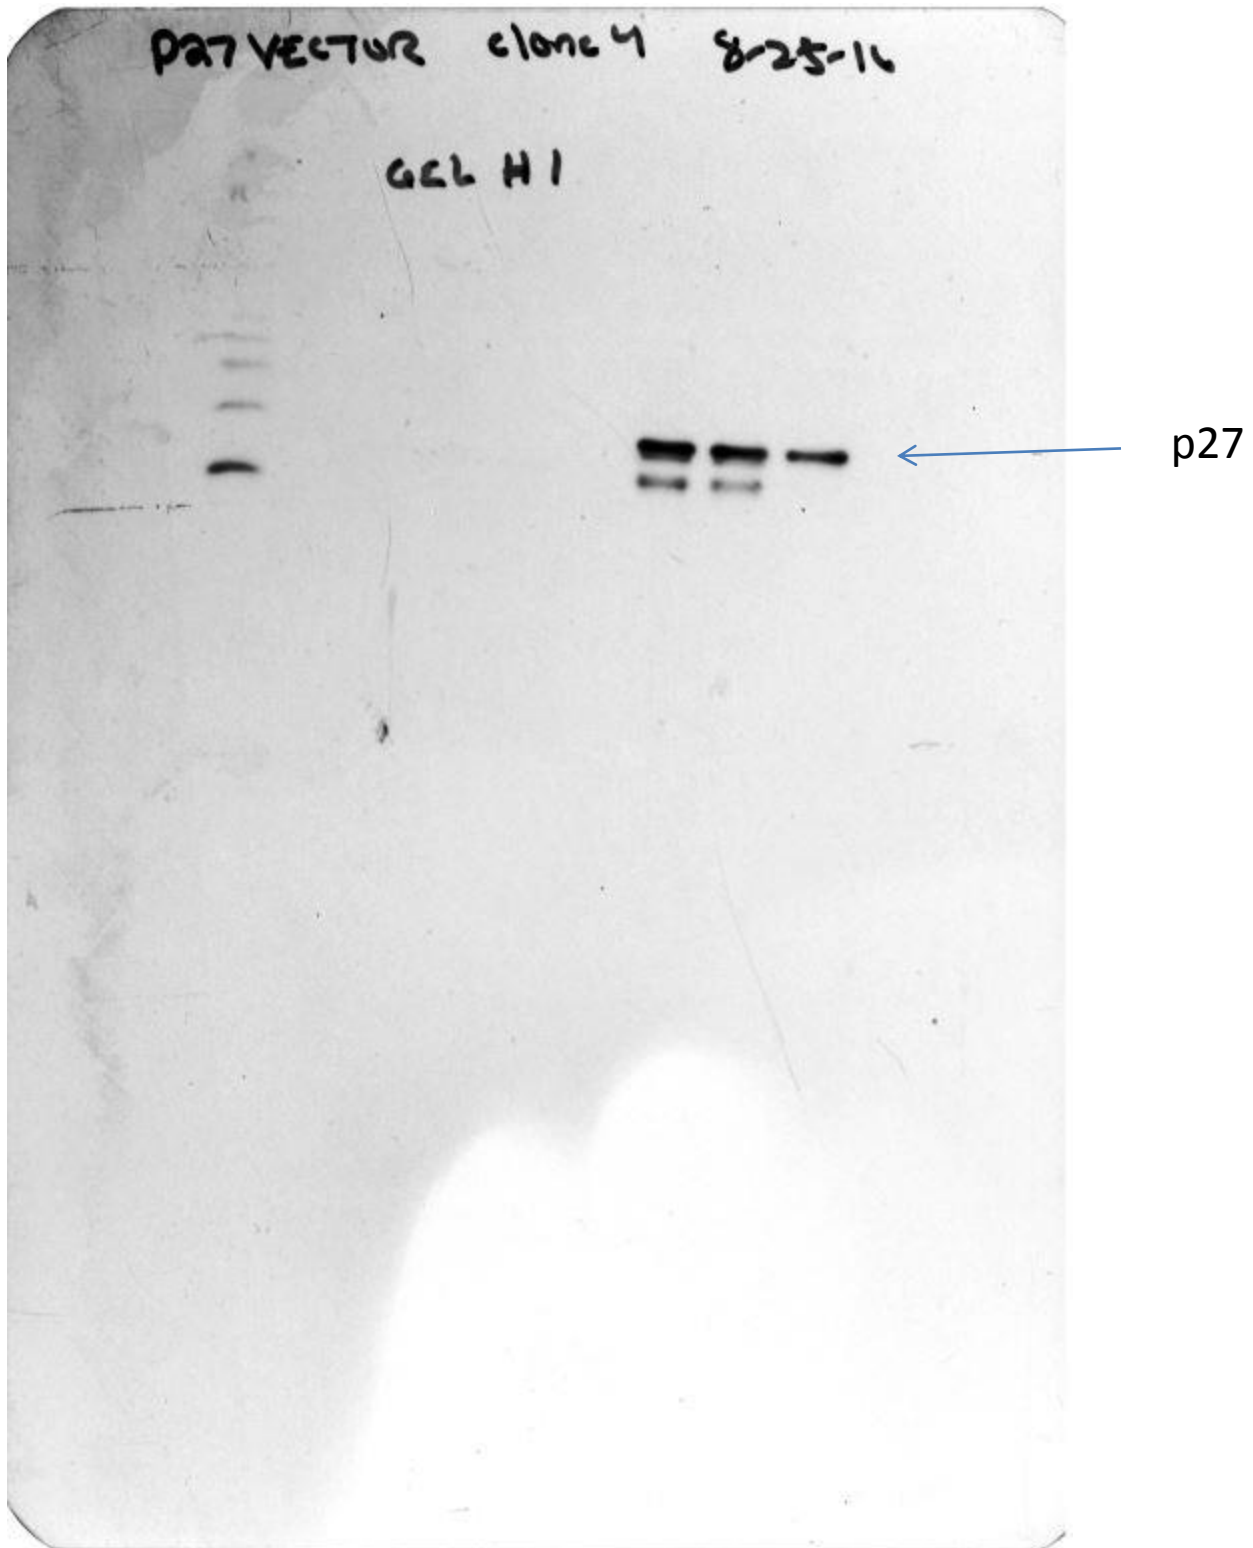

Figure 5H\_Clone4\_GAPDH

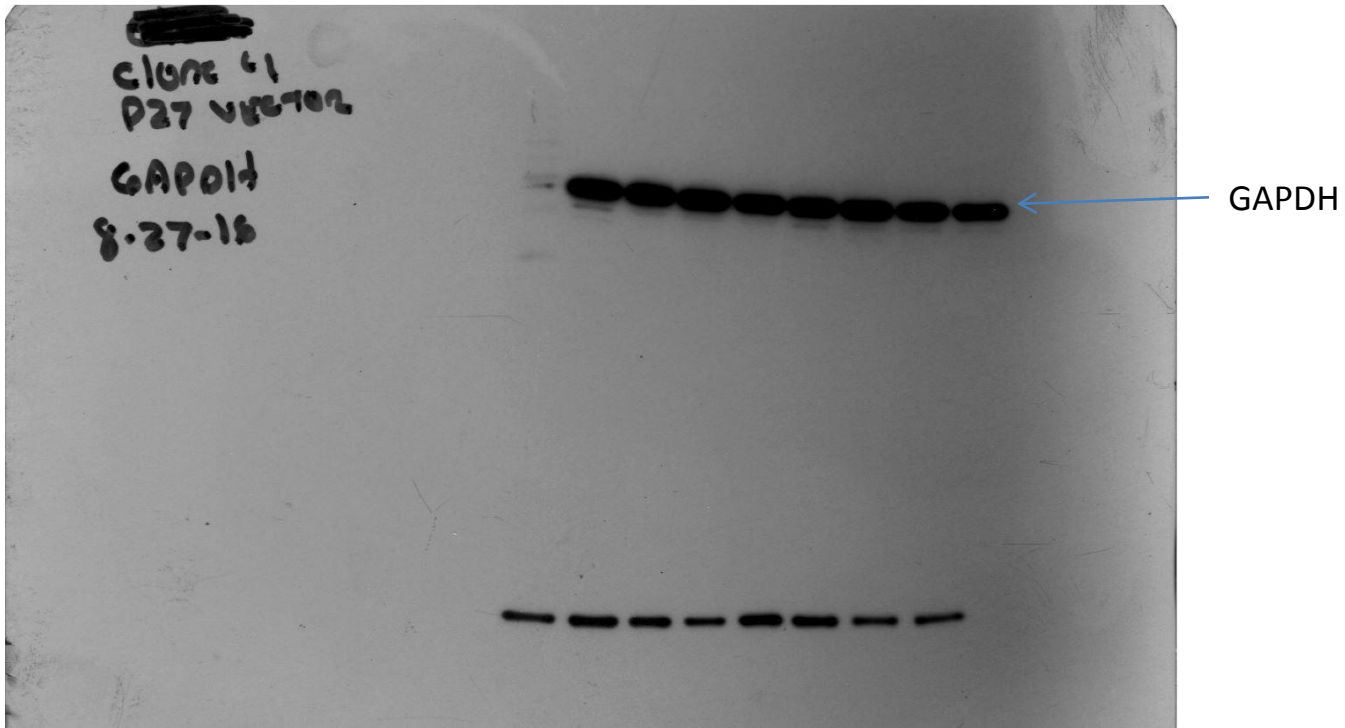

Figure 7A\_Clone4\_FOXO3\_FOXO4

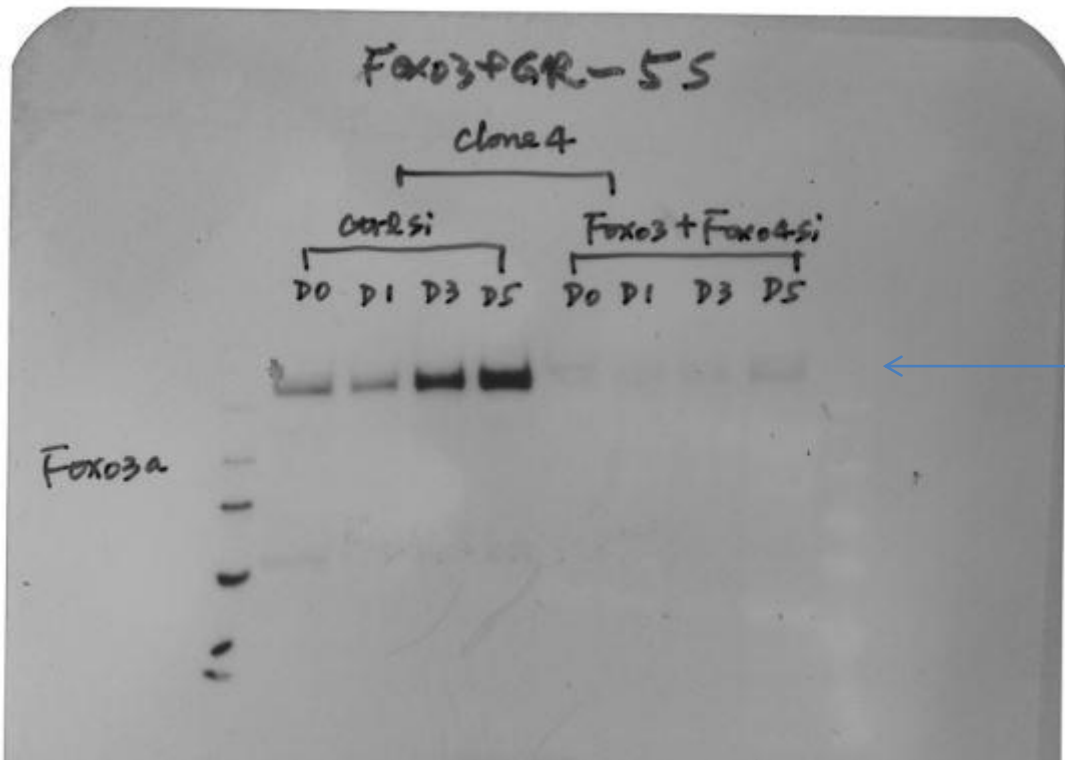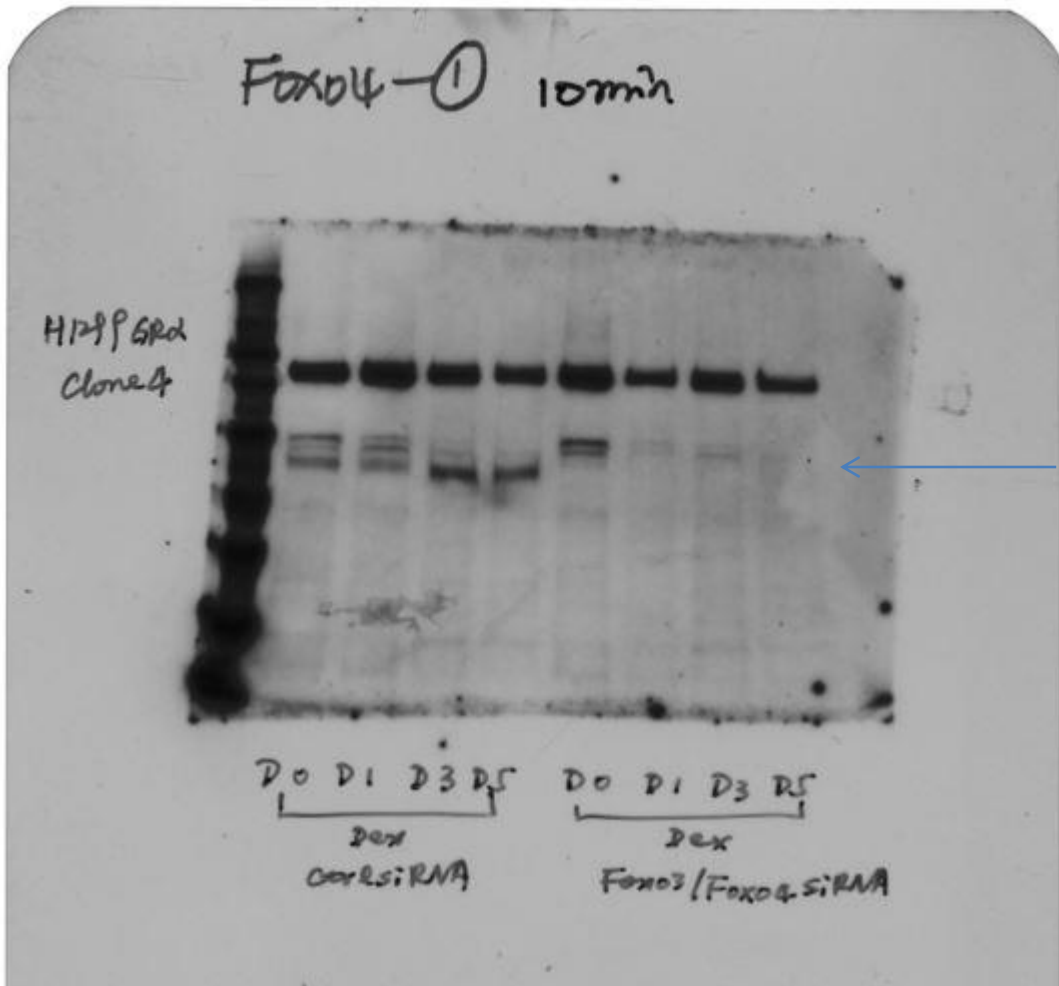

Figure 7A\_Clone4\_p27

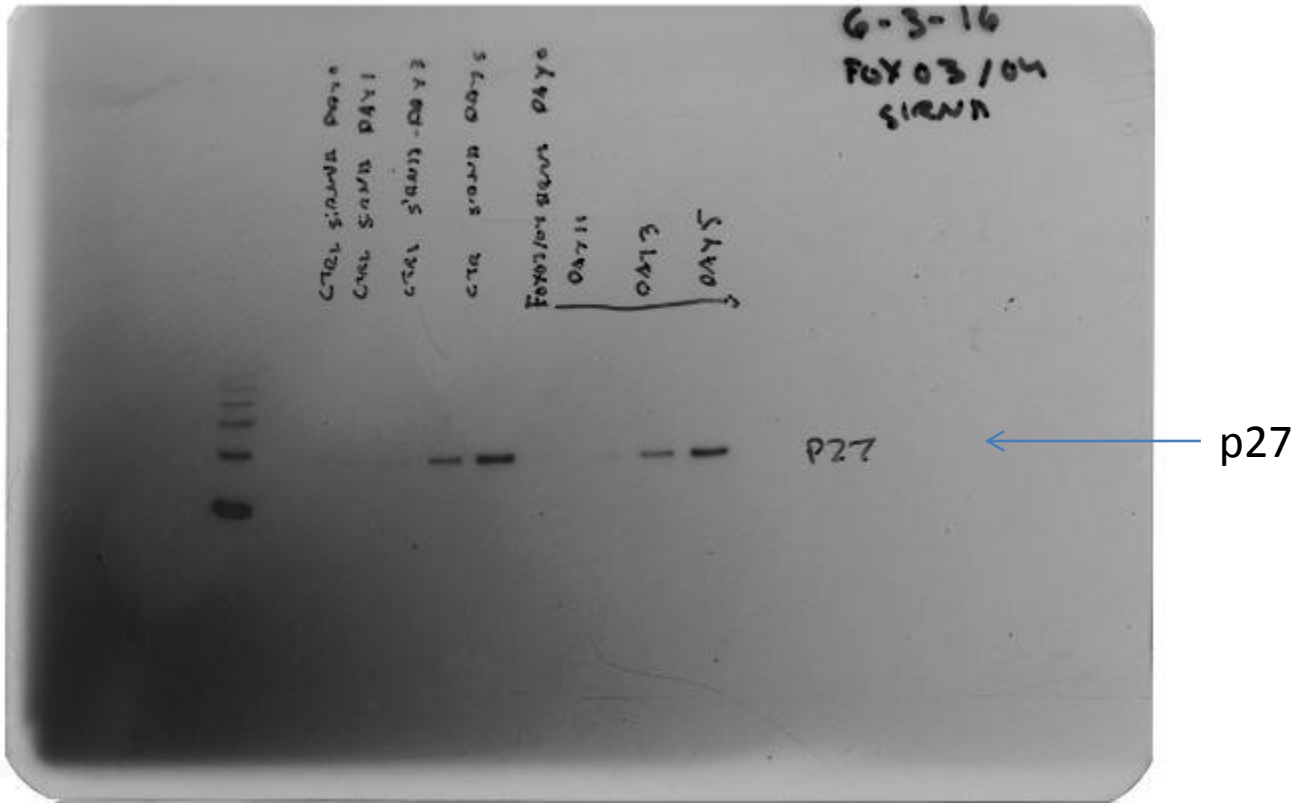

Figure 7A\_Clone4\_GAPDH

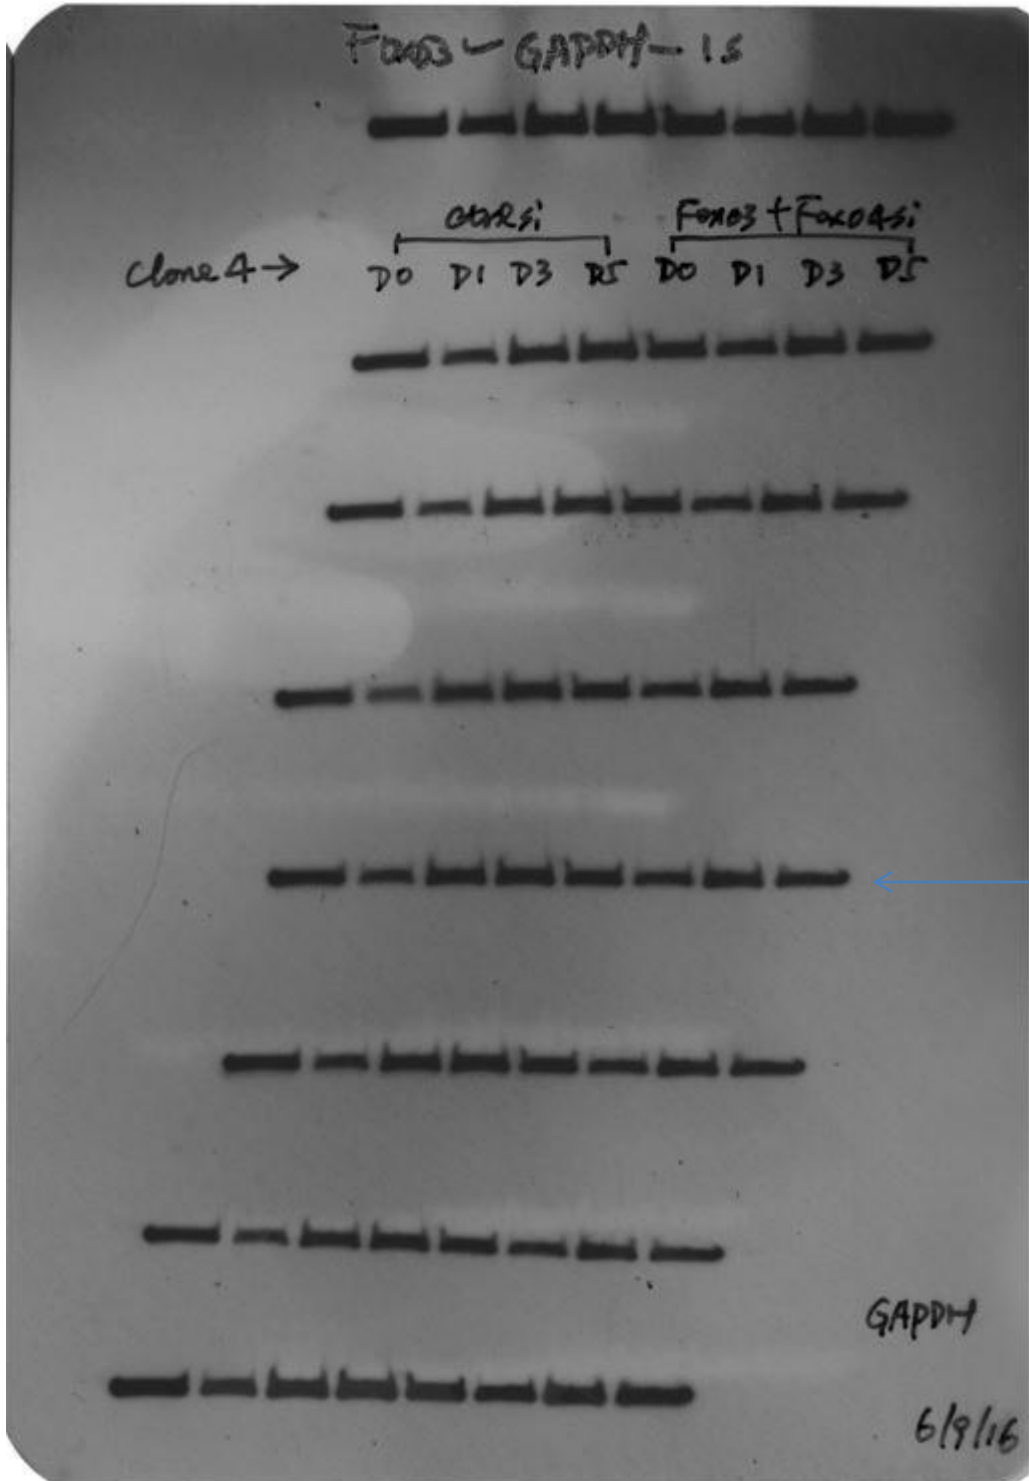

Figure 7D\_Clone4\_p21

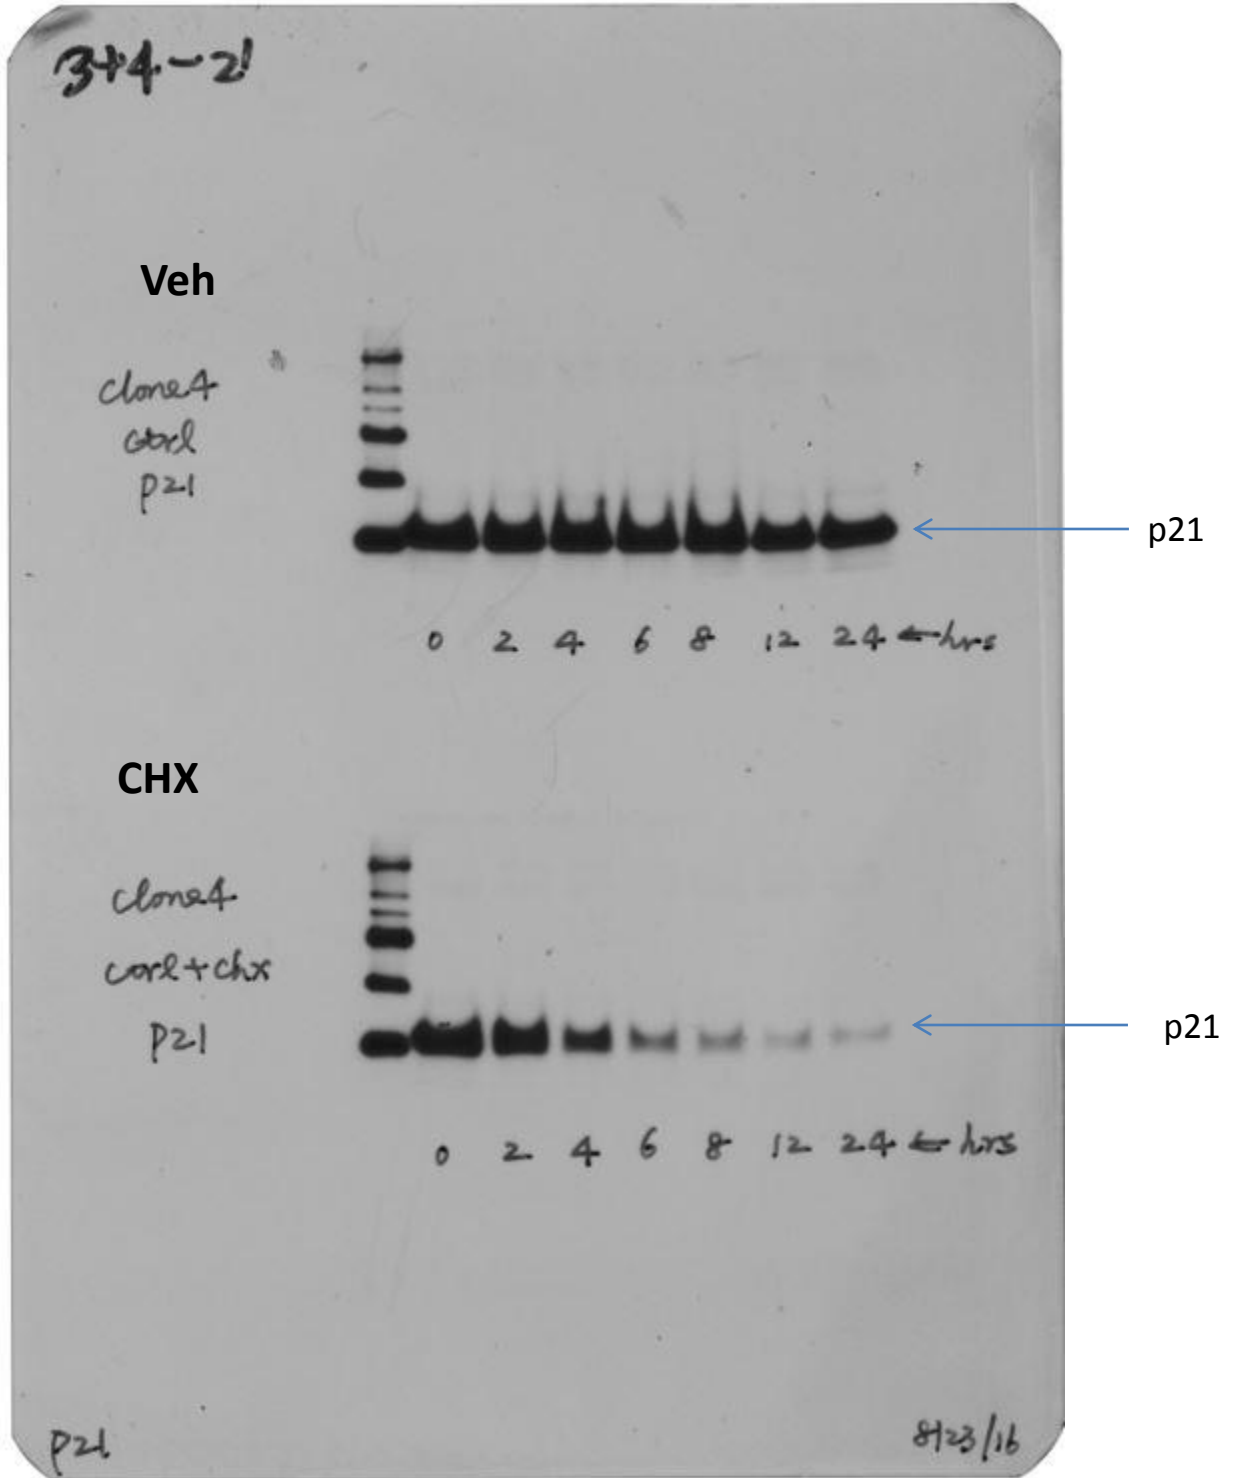

Figure 7E\_Clone4\_NoDex\_p27

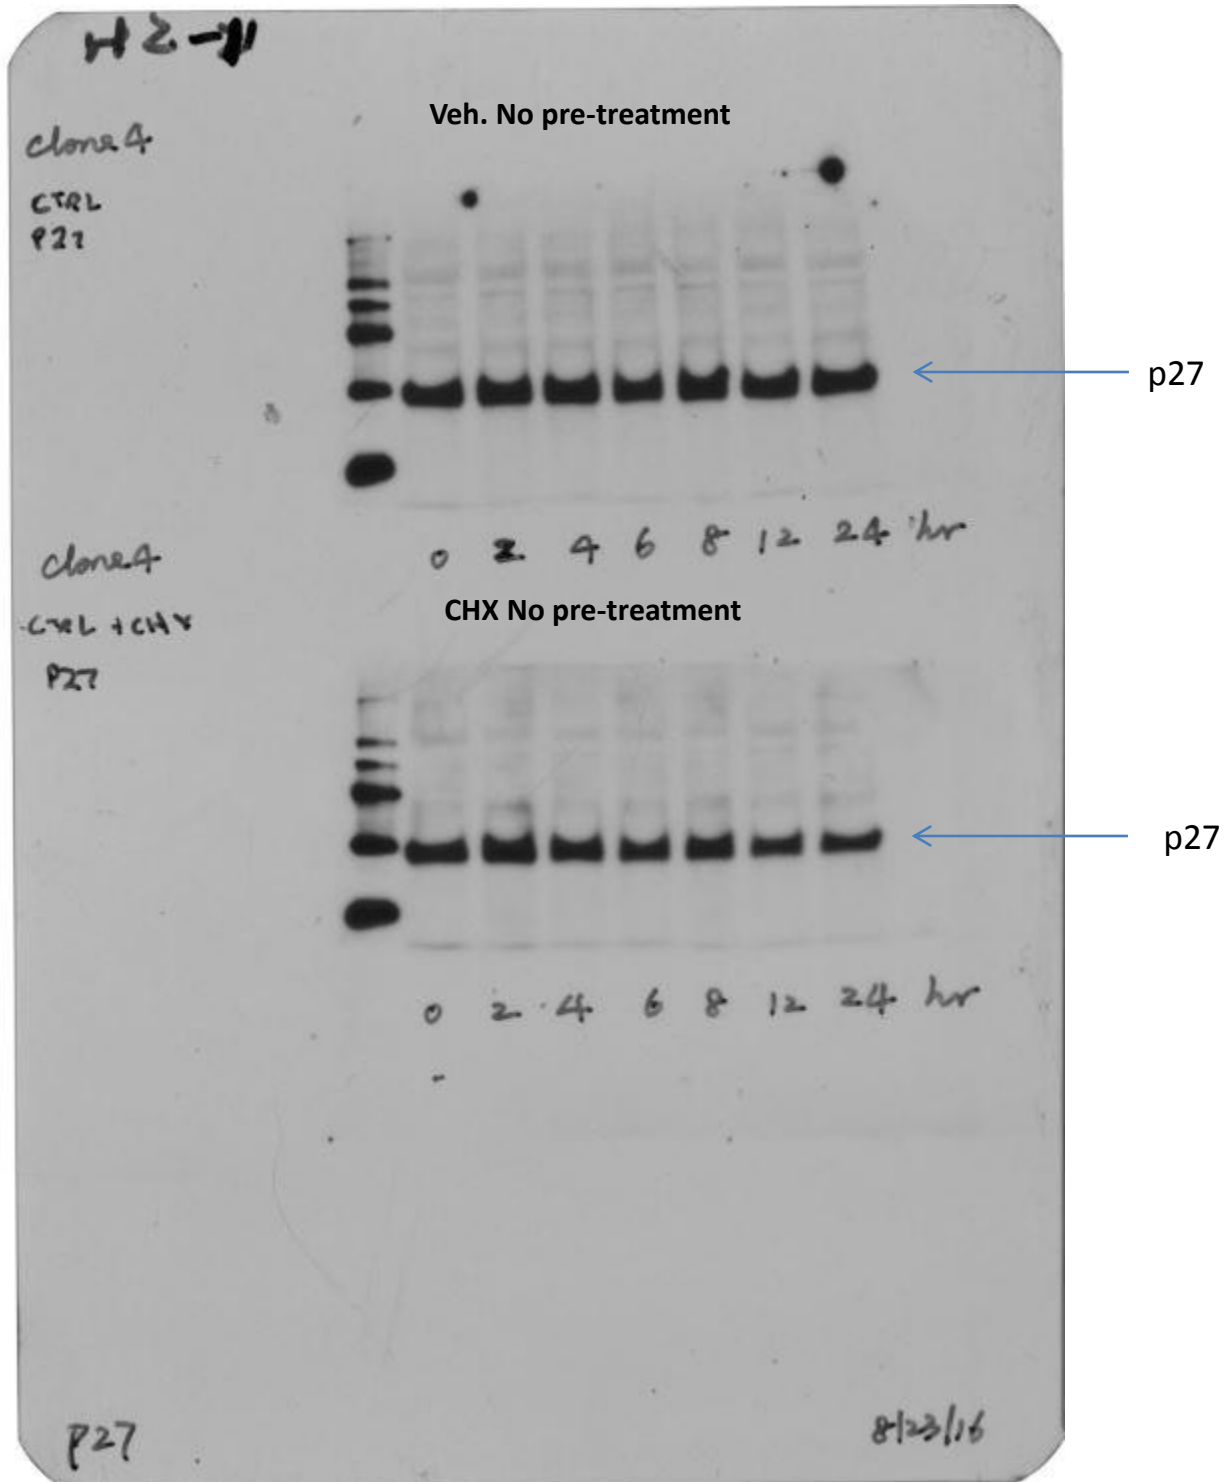



Figure 7E\_Clone4\_NoDex\_α-Tubulin

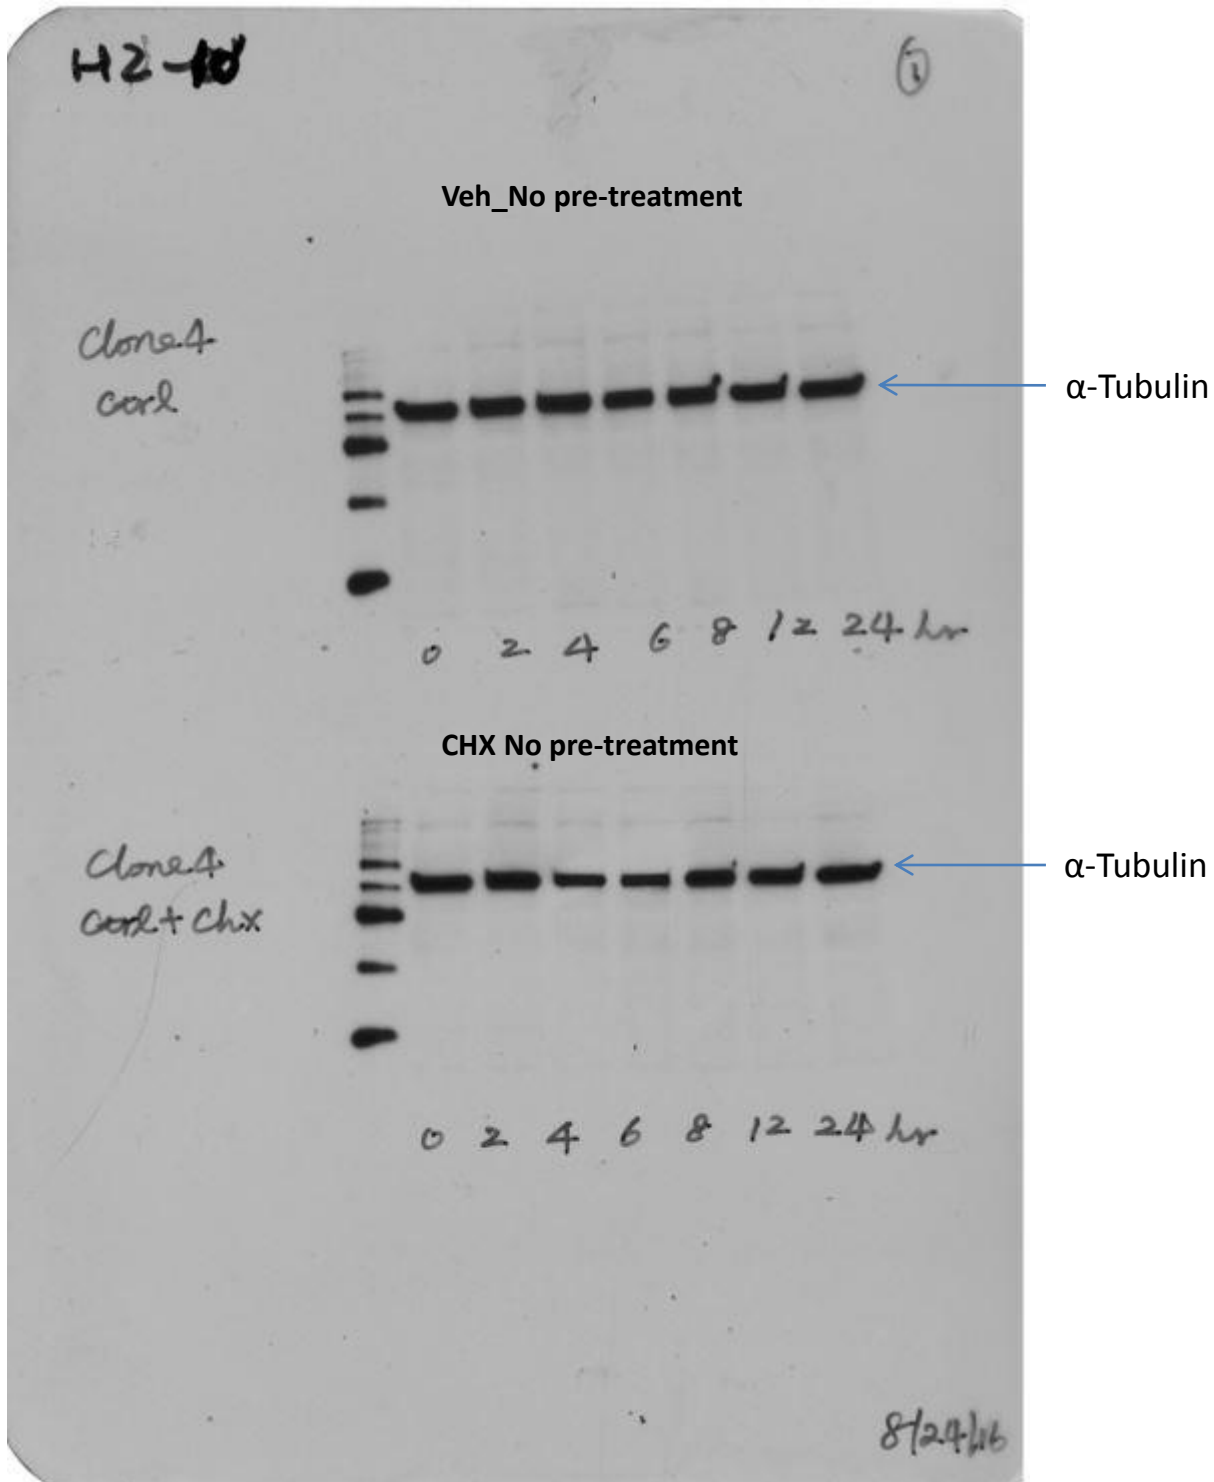

Figure 7E\_Clone4\_Dex\_p27

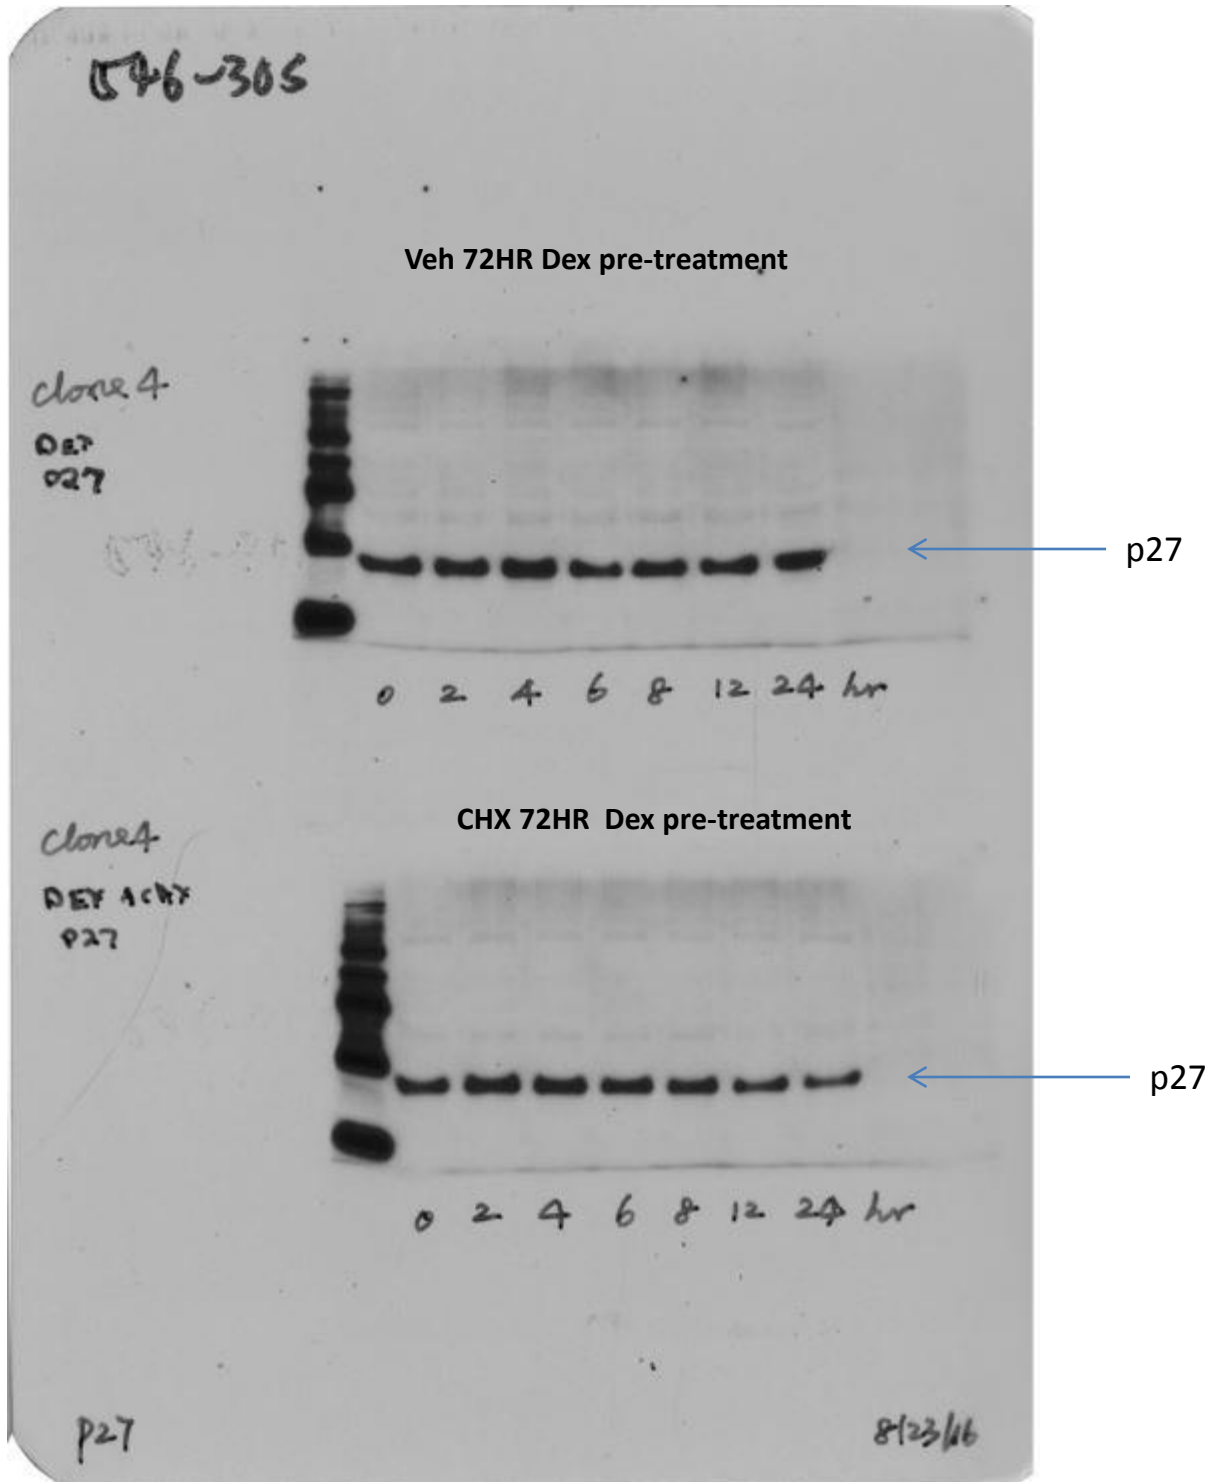

Figure 7E\_Clone4\_Dex\_  $\alpha$ -Tubulin

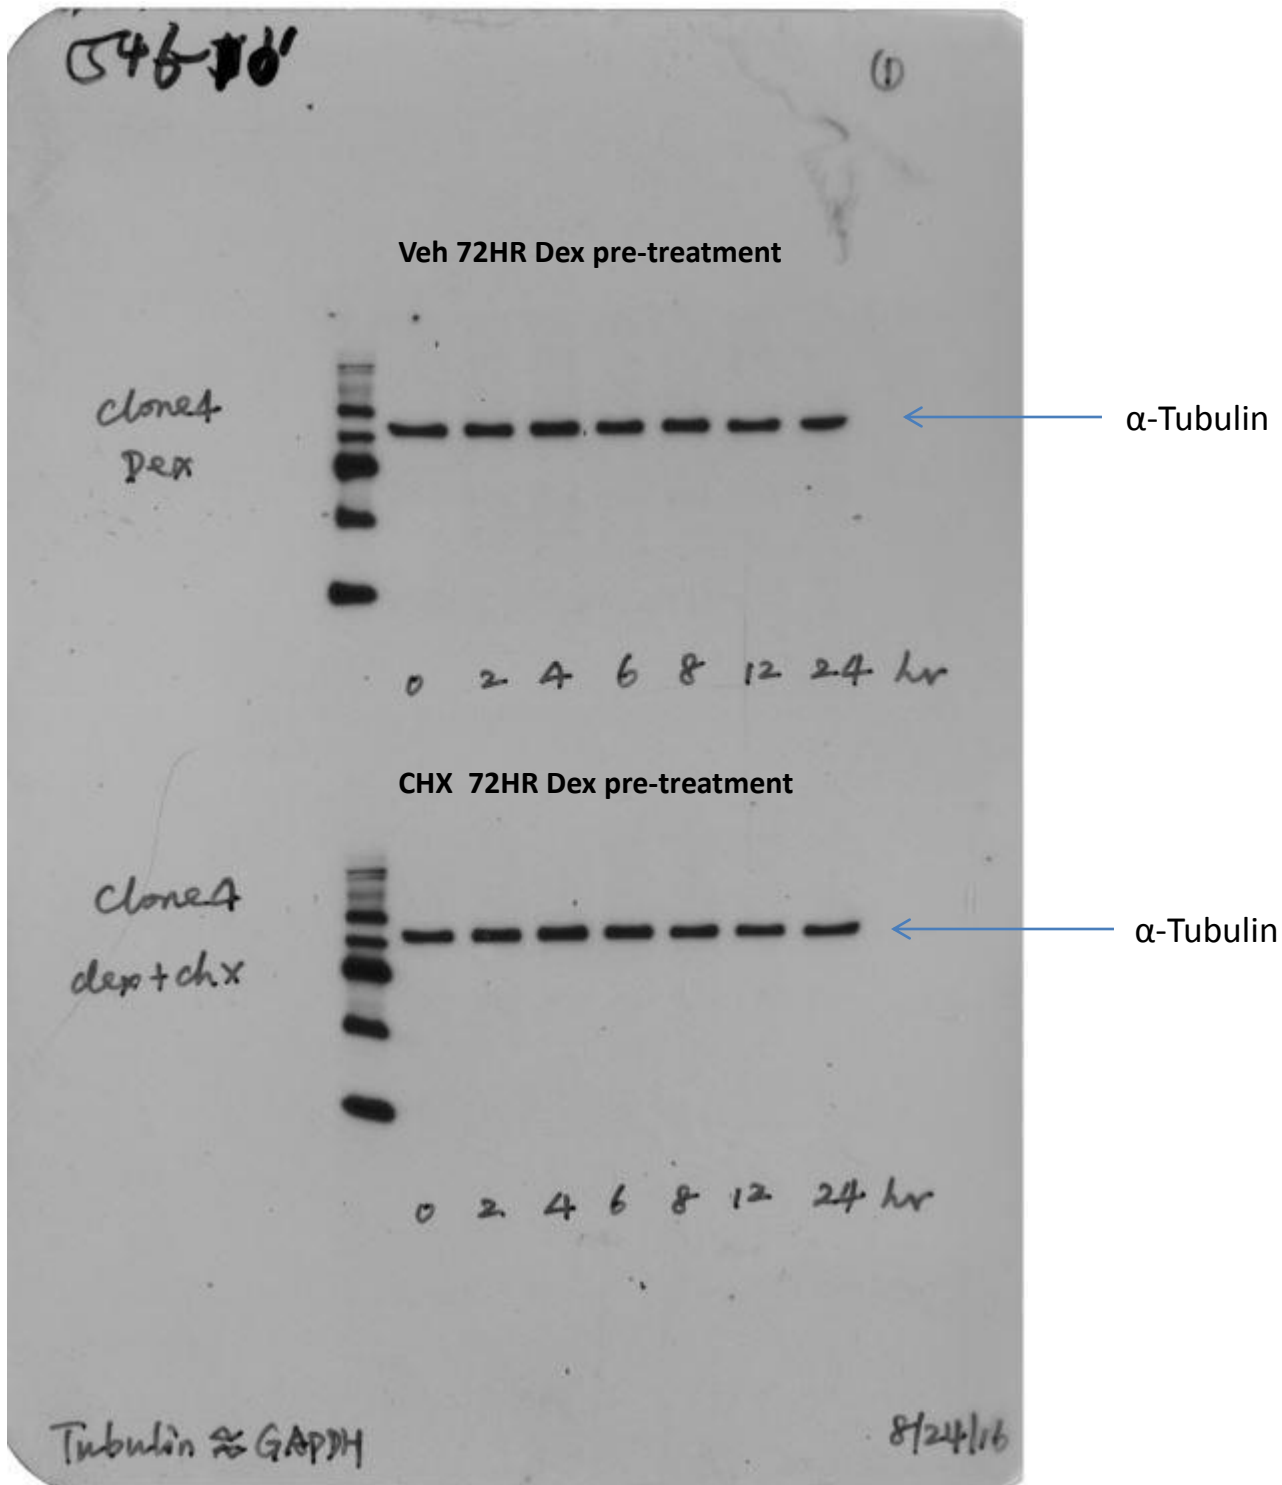

Supplement: 41598_2018_34475_MOESM2_ESM.pdf [file 41598_2018_34475_MOESM2_ESM.pdf]
