# Supplementary material for: Chronic p27Kip1 Induction by Dexamethasone Causes Senescence Phenotype and Permanent Cell Cycle Blockade in Lung Adenocarcinoma Cells Over-expressing Glucocorticoid Receptor
Source: PubMed Central journal article supplement (PMC6207728; doi:10.1038/s41598-018-34475-8), 2018-10-30
Supplement: 41598_2018_34475_MOESM1_ESM.pdf [file 41598_2018_34475_MOESM1_ESM.pdf]

## **Supplementary Tables**

**Manuscript title:** Chronic p27<sup>Kip1</sup> Induction by Dexamethasone Causes Senescence Phenotype and Permanent Cell Cycle Blockade in Lung Adenocarcinoma Cells Over-expressing Glucocorticoid Receptor

**Authors:** Mugdha Patki, Thomas McFall, Rayna Rosati, Yanfang Huang, Agnes Malysa, Lisa Polin, Abigail Fielder, Mike R. Wilson, Fulvio Lonardo, Jessica Back, Jing Li, Larry H. Matherly, Gerold Bepler and Manohar Ratnam

**Supplementary Table 1: Monitoring body weights of SCID mice harboring H1299 tumor xenografts in Figure 8A**

| Days After Tumor Implantation              | 0 | 12   | 13   | 14  | 15  | 16   | 17   | 18   | 19   | 20   | 21   | 22   | 23   | 24   | 25  | 26   | 27   |
|--------------------------------------------|---|------|------|-----|-----|------|------|------|------|------|------|------|------|------|-----|------|------|
| Placebo<br>Percent body weight lost/gained | 0 | -4.4 | -4   | -2  | -2  | -4   | 0.4  | 0.4  | 9.15 | 8.75 | -    | -    | -    | -    | -   | -    | -    |
| Dex<br>Percent body weight lost/gained     | 0 | -4.3 | -3.7 | 2.4 | 2.4 | -3.7 | 4.75 | 4.75 | 4.75 | 0    | -1.3 | 4.75 | -3.2 | -3.7 | 2.9 | -3.7 | -1.3 |

**Supplementary Table 2: Monitoring body weights of SCID mice harboring H1299GR $\alpha$  tumor xenografts in Figure 8B**

| Days After Tumor Implantation              | 0 | 12   | 13   | 14 | 15    | 16   | 17   | 18   | 19    | 20    | 21    | 22    | 23    | 24    | 25    | 26    | 27    |
|--------------------------------------------|---|------|------|----|-------|------|------|------|-------|-------|-------|-------|-------|-------|-------|-------|-------|
| Placebo<br>Percent body weight lost/gained | 0 | 0    | -1.7 | 0  | -6.05 | -1.7 | -1.7 | -1.7 | 0     | 0     | -     | -     | -     | -     | -     | -     | -     |
| Dex<br>Percent body weight lost/gained     | 0 | -3.9 | -3.9 | +2 | 0     | -3.9 | 0    | -3.9 | -7.85 | -11.7 | -9.75 | -11.7 | -13.7 | -7.75 | -3.75 | -7.75 | -11.7 |
